# Supplementary material
Source: PubMed Central journal article supplement (PMC5380371)

**Supplementary Table 1. Clinical and pathological characteristics of study subjects**

| <b>Variables</b>                            | <b>16 HCC tissues, No (%)</b> |
|---------------------------------------------|-------------------------------|
| <b>Age at diagnosis or blood collection</b> |                               |
| Mean $\pm$ SD (yrs)                         | 64.5 $\pm$ 10.9               |
| < 60 yrs                                    | 4 (25)                        |
| $\geq$ 60 yrs                               | 12 (75)                       |
| <b>Gender</b>                               |                               |
| Male                                        | 11 (69)                       |
| Female                                      | 5 (31)                        |
| <b>Ethnicity</b>                            |                               |
| Caucasian                                   | 10 (64)                       |
| Hispanic                                    | 2 (12)                        |
| African-American                            | 2 (12)                        |
| Asian                                       | 2 (12)                        |
| Unknown/Other                               | 0 (0)                         |
| <b>Viral infection</b>                      |                               |
| HBV (-) and HCV (-)                         | 6 (38)                        |
| HBV (+) and HCV (-)                         | 3 (19)                        |
| HBV (-) and HCV (+)                         | 5 (31)                        |
| HBV (+) and HCV (+)                         | 0 (0)                         |
| Missing                                     | 2 (12)                        |
| <b>Cirrhosis</b>                            |                               |
| Absence                                     | 5 (31)                        |
| Presence                                    | 11 (69)                       |
| Missing                                     | 0 (0)                         |
| <b>Tumor grade *</b>                        |                               |
| I-II                                        | 7 (44)                        |
| III-IV                                      | 9 (56)                        |

\* Edmondson and Steiner grade;

**Supplementary Table 2.** The C<sub>q</sub> values of 157 miRNAs/ncRNAs detectable in 100% of HCC tissues, which were used to determine the most stable 2 normalizers

| IDs  | Tumor status | <a href="#">miR-139-5p</a> | <a href="#">miR-486</a> | <a href="#">miR-214</a> | <a href="#">miR-339-3p</a> | <a href="#">miR-598</a> | <a href="#">RNU44</a> | <a href="#">miR-199a-3p</a> | <a href="#">miR-376c</a> | <a href="#">miR-484</a> |
|------|--------------|----------------------------|-------------------------|-------------------------|----------------------------|-------------------------|-----------------------|-----------------------------|--------------------------|-------------------------|
| 7514 | Tumor        | 27.378                     | 30.823                  | 26.128                  | 29.33                      | 31.558                  | 23.579                | 24.387                      | 26.301                   | 22.908                  |
| 7516 | Tumor        | 26.631                     | 28.388                  | 30.376                  | 29.367                     | 32.081                  | 23.495                | 28.669                      | 32.596                   | 23.765                  |
| 7518 | Tumor        | 28.999                     | 28.512                  | 30.549                  | 28.777                     | 32.222                  | 22.628                | 28.323                      | 29.509                   | 23.227                  |
| 7524 | Tumor        | 29.618                     | 29.029                  | 31.415                  | 30.349                     | 31.901                  | 23.825                | 29.447                      | 30.775                   | 24.904                  |
| 7526 | Tumor        | 26.83                      | 29.361                  | 25.523                  | 29.514                     | 30.769                  | 22.04                 | 23.771                      | 28.965                   | 22.864                  |
| 7528 | Tumor        | 26.091                     | 27.902                  | 24.961                  | 30.896                     | 31.391                  | 21.719                | 23.173                      | 27.943                   | 23.836                  |
| 7530 | Tumor        | 29.153                     | 29.508                  | 24.585                  | 30.619                     | 30.521                  | 22.061                | 22.754                      | 29.674                   | 24.323                  |
| 7669 | Tumor        | 26.983                     | 30.94                   | 26.594                  | 29.958                     | 30.944                  | 23.339                | 24.693                      | 29.39                    | 23.522                  |
| 7980 | Tumor        | 28.14                      | 31.438                  | 30.395                  | 30.341                     | 32.281                  | 23.972                | 28.026                      | 31.037                   | 24.27                   |
| 7966 | Tumor        | 26.747                     | 28.773                  | 27.584                  | 29.294                     | 31.793                  | 23.784                | 26.018                      | 29.372                   | 24.332                  |
| 6240 | Tumor        | 31.224                     | 31.215                  | 32.829                  | 30.984                     | 34.735                  | 25.3                  | 30.749                      | 32.908                   | 24.523                  |
| 7673 | Tumor        | 30.706                     | 30.802                  | 32.207                  | 32.283                     | 33.728                  | 25.118                | 30.445                      | 32.634                   | 24.527                  |
| 7682 | Tumor        | 28.977                     | 31.611                  | 26.953                  | 30.117                     | 32.146                  | 25.474                | 26.088                      | 30.352                   | 22.603                  |
| 8639 | Tumor        | 31.421                     | 30.12                   | 29.397                  | 29.869                     | 32.131                  | 24.535                | 28.816                      | 30.541                   | 24.347                  |
| 8651 | Tumor        | 30.988                     | 31.099                  | 29.766                  | 30.34                      | 32.986                  | 24.512                | 28.564                      | 31.675                   | 25.812                  |
| 8672 | Tumor        | 30.141                     | 31.3                    | 28.233                  | 31.364                     | 34.241                  | 25.936                | 27.646                      | 31.71                    | 25.511                  |
| 7513 | Non-tumor    | 25.442                     | 28.332                  | 25.419                  | 30.42                      | 30.398                  | 24.329                | 23.378                      | 27.737                   | 23.958                  |
| 7515 | Non-tumor    | 25.964                     | 22.639                  | 23.86                   | 29.486                     | 29.14                   | 24.084                | 21.939                      | 27.898                   | 24.725                  |
| 7517 | Non-tumor    | 25.357                     | 28.168                  | 26.811                  | 30.878                     | 30.75                   | 24.226                | 24.718                      | 29.27                    | 24.595                  |
| 7523 | Non-tumor    | 26.544                     | 27.04                   | 26.031                  | 30.175                     | 30.933                  | 24.665                | 24.447                      | 28.883                   | 24.702                  |
| 7525 | Non-tumor    | 26.177                     | 28.272                  | 25.341                  | 30.997                     | 30.616                  | 24.534                | 23.71                       | 28.703                   | 24.334                  |
| 7527 | Non-tumor    | 26.248                     | 28.879                  | 25.674                  | 29.782                     | 30.895                  | 22.82                 | 23.268                      | 28.581                   | 24.867                  |
| 7529 | Non-tumor    | 25.206                     | 27.519                  | 24.95                   | 30.841                     | 30.153                  | 24.209                | 22.756                      | 27.72                    | 23.804                  |
| 7670 | Non-tumor    | 25.332                     | 27.962                  | 26.562                  | 32.086                     | 31.943                  | 24.853                | 24.451                      | 28.87                    | 24.414                  |
| 7979 | Non-tumor    | 26.659                     | 27.706                  | 27.078                  | 33.034                     | 31.094                  | 24.795                | 24.995                      | 28.446                   | 27.143                  |
| 7965 | Non-tumor    | 25.286                     | 26.169                  | 26.154                  | 30.516                     | 30.851                  | 23.814                | 23.695                      | 27.679                   | 24.209                  |
| 6239 | Non-tumor    | 26.809                     | 28.961                  | 28.817                  | 33.563                     | 33.927                  | 27.875                | 29.011                      | 31.699                   | 25.201                  |
| 7674 | Non-tumor    | 26.381                     | 27.077                  | 26.092                  | 31.552                     | 31.422                  | 24.985                | 25.125                      | 29.506                   | 23.974                  |
| 7681 | Non-tumor    | 26.57                      | 28.792                  | 26.101                  | 32.504                     | 30.587                  | 26.62                 | 26.089                      | 30.337                   | 24.605                  |
| 8638 | Non-tumor    | 26.529                     | 28.16                   | 27.555                  | 31.222                     | 32.039                  | 26.783                | 26.658                      | 29.321                   | 25.577                  |
| 8650 | Non-tumor    | 27.442                     | 29.4                    | 27.706                  | 32.821                     | 30.8                    | 27.232                | 27.881                      | 30.373                   | 25.692                  |
| 8671 | Non-tumor    | 26.57                      | 28.792                  | 26.101                  | 32.504                     | 30.587                  | 27.546                | 26.089                      | 30.337                   | 24.605                  |

| <b>IDs</b> | <b>Tumor status</b> | <b><u>miR-422a</u></b> | <b><u>miR-885-5p</u></b> | <b><u>miR-204</u></b> | <b><u>miR-574-3p</u></b> | <b><u>mmu-miR-451</u></b> | <b><u>miR-133a</u></b> | <b><u>miR-130a</u></b> | <b><u>miR-223</u></b> | <b><u>miR-30d</u></b> |
|------------|---------------------|------------------------|--------------------------|-----------------------|--------------------------|---------------------------|------------------------|------------------------|-----------------------|-----------------------|
| 7514       | Tumor               | 29.997                 | 25.88                    | 29.405                | 24.362                   | 31.177                    | 30.787                 | 29.735                 | 21.883                | 24.605                |
| 7516       | Tumor               | 31.451                 | 24.602                   | 28.834                | 25.181                   | 27.26                     | 34.465                 | 29.516                 | 23.231                | 25.488                |
| 7518       | Tumor               | 29.721                 | 24.328                   | 29.474                | 23.683                   | 26.248                    | 31.755                 | 27.998                 | 23.699                | 26.526                |
| 7524       | Tumor               | 28.095                 | 28.979                   | 29.127                | 24.937                   | 27.599                    | 34.066                 | 31.776                 | 24.205                | 25.997                |
| 7526       | Tumor               | 29.983                 | 24.349                   | 28.974                | 23.877                   | 28.979                    | 30.078                 | 28.872                 | 22.121                | 23.249                |
| 7528       | Tumor               | 28.806                 | 29.829                   | 27.464                | 23.621                   | 26.03                     | 29.002                 | 28.65                  | 20.641                | 24.468                |
| 7530       | Tumor               | 30.073                 | 30.576                   | 31.246                | 24.069                   | 28.127                    | 30.085                 | 30.89                  | 20.511                | 25.644                |
| 7669       | Tumor               | 29.688                 | 24.707                   | 29.642                | 25.072                   | 30.37                     | 30.269                 | 30.955                 | 22.502                | 25.307                |
| 7980       | Tumor               | 27.159                 | 24.377                   | 29.305                | 24.417                   | 29.206                    | 33.46                  | 31.98                  | 24.192                | 26.175                |
| 7966       | Tumor               | 28.8                   | 24.036                   | 28.312                | 25.267                   | 26.753                    | 31.178                 | 30.104                 | 21.468                | 25.347                |
| 6240       | Tumor               | 36.43                  | 23.882                   | 30.37                 | 24.757                   | 34.696                    | 35.494                 | 31.06                  | 25.521                | 26.929                |
| 7673       | Tumor               | 33.865                 | 26.376                   | 29.446                | 25.877                   | 31.491                    | 33.838                 | 31.945                 | 22.717                | 24.347                |
| 7682       | Tumor               | 31.289                 | 24.074                   | 30.583                | 24.604                   | 31.937                    | 29.407                 | 29.286                 | 23.665                | 26.221                |
| 8639       | Tumor               | 30.028                 | 30.747                   | 33.087                | 25.957                   | 30.419                    | 33.205                 | 31.564                 | 19.386                | 26.058                |
| 8651       | Tumor               | 30.9                   | 34.124                   | 35.144                | 26.563                   | 30.518                    | 32.061                 | 29.187                 | 21.469                | 26.597                |
| 8672       | Tumor               | 34.448                 | 25.958                   | 30.787                | 25.53                    | 33.637                    | 32.988                 | 30.445                 | 24.513                | 28.299                |
| 7513       | Non-tumor           | 28.746                 | 24.727                   | 27.791                | 24.953                   | 26.735                    | 28.773                 | 28.273                 | 21.422                | 26.204                |
| 7515       | Non-tumor           | 29.541                 | 25.854                   | 26.496                | 23.595                   | 21.511                    | 26.208                 | 26.955                 | 20.56                 | 25.23                 |
| 7517       | Non-tumor           | 27.96                  | 24.086                   | 28.571                | 24.169                   | 26.489                    | 32.04                  | 28.993                 | 21.345                | 26.104                |
| 7523       | Non-tumor           | 27.442                 | 25.137                   | 28.989                | 24.474                   | 25.911                    | 30.461                 | 30.061                 | 19.802                | 25.735                |
| 7525       | Non-tumor           | 29.485                 | 25.766                   | 28.358                | 25.635                   | 27.337                    | 30.778                 | 29.425                 | 22.154                | 26.247                |
| 7527       | Non-tumor           | 27.62                  | 24.908                   | 27.945                | 24.583                   | 26.376                    | 30.411                 | 27.968                 | 20.503                | 25.145                |
| 7529       | Non-tumor           | 27.941                 | 24.682                   | 27.895                | 24.226                   | 25.654                    | 30.505                 | 28.032                 | 20.498                | 26.029                |
| 7670       | Non-tumor           | 26.941                 | 24.1                     | 28.007                | 23.876                   | 26.322                    | 30.749                 | 29.095                 | 21.357                | 25.538                |
| 7979       | Non-tumor           | 28.522                 | 25.063                   | 29.333                | 25.347                   | 24.626                    | 29.931                 | 30.047                 | 20.708                | 27.019                |
| 7965       | Non-tumor           | 26.808                 | 23.898                   | 28.012                | 23.654                   | 24.82                     | 30.462                 | 28.95                  | 20.447                | 24.924                |
| 6239       | Non-tumor           | 31.032                 | 25.061                   | 31.102                | 24.375                   | 32.178                    | 35.03                  | 31.816                 | 23.625                | 28.963                |
| 7674       | Non-tumor           | 29.906                 | 24.97                    | 29.775                | 23.991                   | 29.977                    | 31.412                 | 29.032                 | 22.321                | 27.545                |
| 7681       | Non-tumor           | 30.809                 | 25.025                   | 30.407                | 23.525                   | 31.736                    | 29.302                 | 29.479                 | 22.244                | 27.148                |
| 8638       | Non-tumor           | 30.778                 | 24.662                   | 28.924                | 24.391                   | 30.466                    | 32.044                 | 29.877                 | 22.44                 | 26.642                |
| 8650       | Non-tumor           | 30.682                 | 25.122                   | 30.037                | 24.5                     | 29.568                    | 32.17                  | 31.739                 | 23.657                | 27.395                |
| 8671       | Non-tumor           | 30.809                 | 25.025                   | 30.407                | 23.525                   | 31.736                    | 29.302                 | 29.479                 | 22.244                | 30.992                |

| <b>IDs</b> | <b>Tumor status</b> | <b>miR-550</b> | <b>miR-122</b> | <b>miR-224</b> | <b>miR-100</b> | <b>miR-99a</b> | <b>let-7b</b> | <b>miR-106a</b> | <b>miR-93#</b> | <b>miR-345</b> |
|------------|---------------------|----------------|----------------|----------------|----------------|----------------|---------------|-----------------|----------------|----------------|
| 7514       | Tumor               | 33.198         | 21.237         | 26.47          | 25.583         | 25.945         | 26.301        | 20.323          | 26.514         | 25.981         |
| 7516       | Tumor               | 32.739         | 20.329         | 25.681         | 25.477         | 25.935         | 25.83         | 19.607          | 26.893         | 26.403         |
| 7518       | Tumor               | 29.463         | 21.163         | 24.131         | 26.096         | 26.582         | 27.991        | 20.226          | 24.93          | 25.177         |
| 7524       | Tumor               | 30.326         | 20.506         | 25.793         | 27.361         | 27.582         | 29.045        | 21.963          | 27.098         | 26.495         |
| 7526       | Tumor               | 31.618         | 20.356         | 26.282         | 25.343         | 25.57          | 25.09         | 19.347          | 25.748         | 24.931         |
| 7528       | Tumor               | 32.071         | 22.037         | 28.052         | 24.795         | 24.906         | 25.853        | 21.368          | 26.296         | 26.633         |
| 7530       | Tumor               | 31.203         | 27.717         | 30.624         | 25.634         | 25.859         | 25.828        | 20.687          | 24.882         | 26.776         |
| 7669       | Tumor               | 33.17          | 22.085         | 25.8           | 25.992         | 26.413         | 26.386        | 20.871          | 27.61          | 27.545         |
| 7980       | Tumor               | 32.658         | 19.975         | 25.784         | 27.173         | 27.409         | 26.28         | 21.771          | 26.955         | 25.283         |
| 7966       | Tumor               | 31.472         | 21.284         | 25.871         | 25.594         | 26.11          | 26.871        | 21.686          | 26.987         | 26.852         |
| 6240       | Tumor               | 33.216         | 22.359         | 27.185         | 29.311         | 30.216         | 34.091        | 23.933          | 27.963         | 27.216         |
| 7673       | Tumor               | 35.364         | 22.089         | 28.58          | 31.775         | 32.275         | 30.249        | 24.715          | 28.974         | 28.211         |
| 7682       | Tumor               | 33.351         | 23.352         | 27.561         | 28.376         | 26.846         | 28.159        | 22.993          | 29.195         | 27.933         |
| 8639       | Tumor               | 32.093         | 24.323         | 31.797         | 32.062         | 29.55          | 31.455        | 23.508          | 27.533         | 29.089         |
| 8651       | Tumor               | 33.829         | 30.821         | 28.567         | 30.164         | 29.897         | 28.486        | 23.906          | 29.886         | 30.29          |
| 8672       | Tumor               | 35.396         | 24.052         | 30.28          | 29.687         | 30.004         | 30.654        | 24.524          | 29.04          | 29.399         |
| 7513       | Non-tumor           | 33.767         | 21.003         | 27.047         | 24.982         | 25.146         | 26.039        | 22.284          | 27.557         | 27.24          |
| 7515       | Non-tumor           | 31.734         | 20.863         | 27.567         | 23.092         | 23.652         | 23.389        | 21.097          | 26.963         | 27.635         |
| 7517       | Non-tumor           | 32.082         | 19.966         | 28.99          | 25.266         | 25.638         | 26.019        | 22.102          | 27.322         | 27.235         |
| 7523       | Non-tumor           | 32.464         | 20.706         | 26.765         | 25.77          | 25.938         | 26.597        | 22.526          | 27.219         | 27.213         |
| 7525       | Non-tumor           | 36.104         | 20.98          | 27.72          | 25.051         | 25.649         | 25.756        | 22.235          | 27.276         | 27.424         |
| 7527       | Non-tumor           | 32.206         | 20.411         | 27.192         | 24.907         | 25.247         | 25.436        | 21.592          | 27.024         | 27.57          |
| 7529       | Non-tumor           | 32.877         | 20.825         | 27.1           | 25.012         | 25.58          | 25.549        | 22.09           | 27.111         | 26.945         |
| 7670       | Non-tumor           | 32.717         | 20.169         | 27.4           | 25.078         | 25.272         | 26.027        | 21.999          | 27.332         | 26.936         |
| 7979       | Non-tumor           | 33.876         | 18.927         | 28.342         | 25.504         | 26.043         | 25.389        | 22.109          | 28.223         | 29.126         |
| 7965       | Non-tumor           | 32.41          | 19.708         | 27.422         | 24.229         | 24.972         | 25.69         | 21.687          | 26.824         | 26.609         |
| 6239       | Non-tumor           | 36.027         | 22.923         | 31.871         | 30.259         | 28.57          | 30.253        | 25.353          | 31.98          | 28.966         |
| 7674       | Non-tumor           | 34.768         | 23.105         | 29.675         | 26.861         | 26.711         | 27.476        | 24.101          | 28.031         | 27.928         |
| 7681       | Non-tumor           | 33.975         | 22.891         | 29.703         | 27.905         | 28.89          | 28.229        | 24.833          | 28.906         | 29.126         |
| 8638       | Non-tumor           | 33.872         | 21.825         | 31.152         | 28.167         | 27.677         | 27.617        | 24.297          | 29.518         | 28.36          |
| 8650       | Non-tumor           | 33.578         | 21.721         | 30.823         | 28.459         | 28.185         | 29.205        | 23.994          | 29.985         | 29.23          |
| 8671       | Non-tumor           | 35.521         | 22.891         | 29.703         | 27.905         | 28.89          | 28.229        | 24.833          | 29.526         | 29.126         |

| <b>IDs</b> | <b>Tumor status</b> | <b><u>miR-362</u></b> | <b><u>RNU48</u></b> | <b><u>miR-222</u></b> | <b><u>miR-411</u></b> | <b><u>miR-203</u></b> | <b><u>miR-150</u></b> | <b><u>miR-1290</u></b> | <b><u>miR-125b</u></b> | <b><u>miR-195</u></b> |
|------------|---------------------|-----------------------|---------------------|-----------------------|-----------------------|-----------------------|-----------------------|------------------------|------------------------|-----------------------|
| 7514       | Tumor               | 30.441                | 20.446              | 22.558                | 27.934                | 30.895                | 23.3                  | 28.18                  | 25.303                 | 24.964                |
| 7516       | Tumor               | 30.875                | 20.603              | 21.078                | 33.25                 | 28.266                | 24.677                | 28.022                 | 25.477                 | 26.939                |
| 7518       | Tumor               | 29.256                | 20.545              | 21.639                | 30.847                | 32.531                | 27.445                | 28.151                 | 26.53                  | 28.268                |
| 7524       | Tumor               | 30.35                 | 20.567              | 24.317                | 31.858                | 30.065                | 24.986                | 27.386                 | 27.991                 | 26.503                |
| 7526       | Tumor               | 28.217                | 19.739              | 21.975                | 30.424                | 27.718                | 22.907                | 27.232                 | 24.573                 | 24.397                |
| 7528       | Tumor               | 30.741                | 19.412              | 21.982                | 29.62                 | 29.002                | 22.938                | 27.954                 | 24.144                 | 23.856                |
| 7530       | Tumor               | 28.256                | 20.317              | 22.682                | 31.047                | 31.19                 | 22.715                | 27.601                 | 25.304                 | 24.946                |
| 7669       | Tumor               | 30.094                | 21.513              | 22.881                | 31.544                | 27.666                | 24.424                | 28.093                 | 25.299                 | 24.555                |
| 7980       | Tumor               | 30.856                | 20.669              | 23.931                | 32.578                | 30.529                | 27.549                | 29.901                 | 25.895                 | 24.724                |
| 7966       | Tumor               | 30.414                | 20.411              | 22.067                | 31.219                | 27.816                | 24.216                | 29.129                 | 25.741                 | 24.977                |
| 6240       | Tumor               | 31.612                | 22.452              | 26.139                | 31.644                | 39.49                 | 28.867                | 29.528                 | 29.273                 | 27.63                 |
| 7673       | Tumor               | 33.951                | 22.409              | 24.427                | 31.918                | 32.231                | 27.428                | 30.37                  | 31.44                  | 27.586                |
| 7682       | Tumor               | 30.883                | 21.613              | 25.751                | 29.678                | 29.617                | 25.195                | 29.569                 | 28.754                 | 26.698                |
| 8639       | Tumor               | 31.629                | 23.13               | 24.477                | 31.188                | 33.384                | 26.051                | 27.187                 | 30.592                 | 28.526                |
| 8651       | Tumor               | 31.597                | 22.278              | 22.619                | 30.467                | 33.831                | 25.364                | 28.531                 | 30.737                 | 28.191                |
| 8672       | Tumor               | 33.661                | 22.716              | 27.26                 | 31.975                | 32.148                | 26.571                | 30.909                 | 30.746                 | 27.834                |
| 7513       | Non-tumor           | 30.574                | 21.111              | 22.57                 | 29.405                | 29.394                | 23.722                | 28.781                 | 24.862                 | 23.89                 |
| 7515       | Non-tumor           | 29.728                | 22.273              | 21.245                | 29.231                | 28.952                | 22.368                | 28.508                 | 22.651                 | 21.899                |
| 7517       | Non-tumor           | 31.047                | 21.141              | 25.223                | 31.393                | 29.093                | 25.233                | 29.015                 | 24.815                 | 24.983                |
| 7523       | Non-tumor           | 31.102                | 21.513              | 24.223                | 31.195                | 29.585                | 23.904                | 28.141                 | 25.077                 | 24.878                |
| 7525       | Non-tumor           | 31.017                | 21.587              | 22.5                  | 30.405                | 29.977                | 22.428                | 28.31                  | 24.807                 | 24.2                  |
| 7527       | Non-tumor           | 30.399                | 20.662              | 22.354                | 30.189                | 28.392                | 22.014                | 27.431                 | 24.408                 | 23.667                |
| 7529       | Non-tumor           | 30.531                | 21.01               | 23.08                 | 29.987                | 28.442                | 23.081                | 28.844                 | 24.644                 | 23.553                |
| 7670       | Non-tumor           | 30.668                | 21.234              | 25.268                | 30.876                | 28.436                | 24.81                 | 29.743                 | 24.299                 | 24.677                |
| 7979       | Non-tumor           | 31.439                | 23.145              | 25.701                | 31.069                | 29.143                | 25.604                | 28.373                 | 25.472                 | 24.944                |
| 7965       | Non-tumor           | 29.659                | 20.367              | 24.515                | 29.857                | 28.235                | 23.854                | 28.781                 | 23.898                 | 24.334                |
| 6239       | Non-tumor           | 34.426                | 23.199              | 31.227                | 31.93                 | 31.498                | 27.692                | 33.957                 | 28.994                 | 28.475                |
| 7674       | Non-tumor           | 32.207                | 21.429              | 25.526                | 29.626                | 30.969                | 23.409                | 30.566                 | 28.022                 | 25.756                |
| 7681       | Non-tumor           | 33.91                 | 22.108              | 27.305                | 30.463                | 30.588                | 24.385                | 30.419                 | 28.34                  | 27.268                |
| 8638       | Non-tumor           | 34.502                | 22.412              | 24.597                | 29.753                | 29.254                | 24.642                | 29.962                 | 28.428                 | 27.087                |
| 8650       | Non-tumor           | 33.735                | 23.342              | 23.798                | 31.118                | 31.729                | 26.668                | 29.299                 | 29.005                 | 27.808                |
| 8671       | Non-tumor           | 33.91                 | 22.332              | 27.305                | 30.463                | 30.588                | 24.385                | 30.109                 | 28.34                  | 27.268                |

| <b>IDs</b> | <b>Tumor status</b> | <b><u>miR-10a</u></b> | <b><u>miR-454</u></b> | <b><u>miR-21</u></b> | <b><u>miR-146a</u></b> | <b><u>miR-136#</u></b> | <b><u>miR-200b</u></b> | <b><u>miR-324-5p</u></b> | <b><u>miR-455-3p</u></b> | <b><u>miR-145</u></b> |
|------------|---------------------|-----------------------|-----------------------|----------------------|------------------------|------------------------|------------------------|--------------------------|--------------------------|-----------------------|
| 7514       | Tumor               | 27.988                | 25.655                | 22.527               | 23.791                 | 28.415                 | 26.718                 | 28.607                   | 30.164                   | 23.519                |
| 7516       | Tumor               | 29.649                | 25.708                | 22.954               | 24.639                 | 33.632                 | 27.686                 | 30.248                   | 31.156                   | 25.108                |
| 7518       | Tumor               | 29.939                | 24.846                | 24.984               | 24.737                 | 31.722                 | 25.065                 | 29.24                    | 30.514                   | 25.119                |
| 7524       | Tumor               | 31.289                | 27.09                 | 22.5                 | 23.404                 | 36.123                 | 31.549                 | 30.55                    | 33.559                   | 26.09                 |
| 7526       | Tumor               | 27.534                | 24.717                | 22.534               | 23.227                 | 31.22                  | 24.803                 | 27.464                   | 27.428                   | 22.782                |
| 7528       | Tumor               | 27.025                | 25.573                | 21.975               | 23.874                 | 30.527                 | 25.924                 | 29.861                   | 30.104                   | 22.024                |
| 7530       | Tumor               | 28.073                | 24.801                | 21.859               | 23.042                 | 32.447                 | 22.963                 | 28.845                   | 29.091                   | 23.982                |
| 7669       | Tumor               | 28.483                | 27.079                | 22.656               | 24.738                 | 31.961                 | 28.452                 | 31.198                   | 30.345                   | 23.285                |
| 7980       | Tumor               | 30.898                | 26.909                | 22.504               | 26.669                 | 35.807                 | 28.272                 | 31.122                   | 29.659                   | 24.868                |
| 7966       | Tumor               | 28.685                | 26.421                | 23.603               | 22.24                  | 32.2                   | 28.434                 | 32.002                   | 30.38                    | 24.003                |
| 6240       | Tumor               | 33.183                | 27.226                | 27.543               | 26.874                 | 36.684                 | 33.095                 | 33.941                   | 35.771                   | 30.576                |
| 7673       | Tumor               | 32.172                | 28.142                | 25.184               | 24.486                 | 36.129                 | 30.492                 | 33.521                   | 33.853                   | 29.744                |
| 7682       | Tumor               | 29.6                  | 27.082                | 25.088               | 25.64                  | 33.388                 | 29.398                 | 34.238                   | 33.294                   | 26.761                |
| 8639       | Tumor               | 28.972                | 26.387                | 25.601               | 25.808                 | 33.245                 | 28.239                 | 32.804                   | 32.197                   | 29.32                 |
| 8651       | Tumor               | 26.333                | 27.668                | 24.587               | 25.444                 | 35.454                 | 25.768                 | 33.574                   | 33.307                   | 28.476                |
| 8672       | Tumor               | 31.367                | 28.577                | 27.331               | 27.55                  | 34.035                 | 29.233                 | 32.729                   | 33.46                    | 27.6                  |
| 7513       | Non-tumor           | 27.538                | 26.985                | 23.31                | 23.596                 | 30.596                 | 24.547                 | 30.993                   | 29.971                   | 22.576                |
| 7515       | Non-tumor           | 25.078                | 24.874                | 22.832               | 23.267                 | 30.576                 | 24.65                  | 29.251                   | 29.501                   | 19.983                |
| 7517       | Non-tumor           | 28.555                | 26.924                | 23.644               | 24.402                 | 31.593                 | 27.475                 | 31.074                   | 28.644                   | 23.728                |
| 7523       | Non-tumor           | 27.84                 | 26.736                | 23.915               | 23.449                 | 31.826                 | 28.269                 | 32.202                   | 30.567                   | 23.451                |
| 7525       | Non-tumor           | 28.087                | 26.966                | 24.195               | 22.972                 | 31.498                 | 25.153                 | 30.343                   | 31.409                   | 23.402                |
| 7527       | Non-tumor           | 27.289                | 26.128                | 22.642               | 22.728                 | 31.093                 | 24.92                  | 30.219                   | 30.171                   | 22.881                |
| 7529       | Non-tumor           | 26.65                 | 26.238                | 22.655               | 23.74                  | 30.333                 | 25.115                 | 30.979                   | 29.631                   | 22.317                |
| 7670       | Non-tumor           | 27.905                | 27.521                | 24.619               | 24.453                 | 31.607                 | 27.145                 | 31.396                   | 28.326                   | 23.338                |
| 7979       | Non-tumor           | 28.879                | 27.271                | 24.592               | 23.936                 | 31.438                 | 26.564                 | 31.03                    | 29.911                   | 25.503                |
| 7965       | Non-tumor           | 27.283                | 26.804                | 23.695               | 23.947                 | 30.614                 | 26.458                 | 30.484                   | 28.674                   | 22.939                |
| 6239       | Non-tumor           | 31.074                | 29.326                | 28.897               | 25.04                  | 33.054                 | 28.27                  | 37.352                   | 32.628                   | 28.795                |
| 7674       | Non-tumor           | 27.18                 | 26.998                | 26.602               | 24.526                 | 32.746                 | 26.393                 | 32.481                   | 31.969                   | 25.904                |
| 7681       | Non-tumor           | 29.741                | 27.294                | 26.913               | 24.908                 | 33.383                 | 28.43                  | 34.694                   | 32.185                   | 26.279                |
| 8638       | Non-tumor           | 29.995                | 27.972                | 26.973               | 24.383                 | 33.173                 | 28.032                 | 34.601                   | 32.534                   | 27.067                |
| 8650       | Non-tumor           | 31.621                | 28.561                | 28.923               | 25.449                 | 33.985                 | 28.326                 | 35.776                   | 31.321                   | 29.044                |
| 8671       | Non-tumor           | 29.741                | 27.294                | 26.913               | 24.908                 | 37.557                 | 28.43                  | 34.694                   | 32.185                   | 26.279                |

| <b>IDs</b> | <b>Tumor status</b> | <b><u>miR-425-5p</u></b> | <b><u>let-7c</u></b> | <b><u>miR-483-5p</u></b> | <b><u>miR-193a-5p</u></b> | <b><u>miR-378</u></b> | <b><u>miR-17</u></b> | <b><u>miR-145#</u></b> | <b><u>miR-27b</u></b> | <b><u>mmu-miR-93</u></b> |
|------------|---------------------|--------------------------|----------------------|--------------------------|---------------------------|-----------------------|----------------------|------------------------|-----------------------|--------------------------|
| 7514       | Tumor               | 27.594                   | 28.611               | 24.756                   | 28.142                    | 31.709                | 20.332               | 30.992                 | 27.003                | 24.678                   |
| 7516       | Tumor               | 27.357                   | 28.622               | 22.728                   | 27.851                    | 36.512                | 19.613               | 32.056                 | 27.393                | 24.441                   |
| 7518       | Tumor               | 26.861                   | 29.904               | 23.428                   | 28.293                    | 31.629                | 20.211               | 31.614                 | 27.488                | 22.695                   |
| 7524       | Tumor               | 28.326                   | 32.138               | 31.872                   | 29.269                    | 31.238                | 21.96                | 34.234                 | 28.214                | 24.674                   |
| 7526       | Tumor               | 26.304                   | 28.996               | 23.312                   | 27.081                    | 36.034                | 19.331               | 29.742                 | 25.424                | 22.723                   |
| 7528       | Tumor               | 28.013                   | 28.491               | 31.083                   | 28.196                    | 31.275                | 21.498               | 28.89                  | 26.333                | 24.582                   |
| 7530       | Tumor               | 27.144                   | 28.512               | 32.382                   | 27.737                    | 31.61                 | 20.608               | 30.728                 | 27.499                | 22.284                   |
| 7669       | Tumor               | 29.513                   | 29.498               | 24.854                   | 29.377                    | 32.123                | 20.731               | 29.808                 | 27.368                | 25.407                   |
| 7980       | Tumor               | 28.508                   | 28.403               | 34.425                   | 27.844                    | 30.378                | 21.694               | 31.466                 | 27.209                | 25.516                   |
| 7966       | Tumor               | 28.59                    | 29.579               | 31.384                   | 28.576                    | 30.602                | 21.6                 | 30.102                 | 27.5                  | 25.023                   |
| 6240       | Tumor               | 29.523                   | 30.671               | 33.477                   | 29.879                    | 28.042                | 24.933               | 34.569                 | 29.928                | 27.832                   |
| 7673       | Tumor               | 30.546                   | 26                   | 30.578                   | 32.301                    | 29.726                | 24.921               | 33.234                 | 30.134                | 29.544                   |
| 7682       | Tumor               | 29.316                   | 30.495               | 26.628                   | 31.35                     | 28.665                | 23.867               | 32.37                  | 29.341                | 27.977                   |
| 8639       | Tumor               | 28.401                   | 33.729               | 31.914                   | 31.811                    | 37.147                | 23.795               | 33.363                 | 30.308                | 26.797                   |
| 8651       | Tumor               | 30.134                   | 33.361               | 30.658                   | 31.596                    | 27.973                | 23.932               | 32.545                 | 32.929                | 28.651                   |
| 8672       | Tumor               | 30.61                    | 32.08                | 33.738                   | 31.901                    | 30.771                | 25.459               | 33.579                 | 28.91                 | 29.338                   |
| 7513       | Non-tumor           | 28.616                   | 28.889               | 26.416                   | 28.405                    | 25.113                | 22.299               | 29.017                 | 27.507                | 25.812                   |
| 7515       | Non-tumor           | 27.215                   | 26.66                | 26.094                   | 27.404                    | 31.807                | 20.663               | 26.543                 | 25.273                | 23.882                   |
| 7517       | Non-tumor           | 28.457                   | 28.004               | 26.855                   | 28.575                    | 30.056                | 21.997               | 30.694                 | 26.677                | 25.111                   |
| 7523       | Non-tumor           | 29.155                   | 28.674               | 27.481                   | 28.233                    | 30.855                | 22.477               | 30.239                 | 27.595                | 25.716                   |
| 7525       | Non-tumor           | 29.033                   | 28.554               | 25.352                   | 28.484                    | 32.781                | 22.229               | 29.802                 | 28.025                | 25.803                   |
| 7527       | Non-tumor           | 28.577                   | 27.477               | 28.21                    | 28.495                    | 29.928                | 21.521               | 29.693                 | 27.02                 | 24.947                   |
| 7529       | Non-tumor           | 28.559                   | 28.776               | 27.792                   | 28.377                    | 31.324                | 21.984               | 29.094                 | 26.972                | 25.118                   |
| 7670       | Non-tumor           | 29.063                   | 27.437               | 27.701                   | 27.793                    | 28.988                | 21.946               | 29.874                 | 26.244                | 25.584                   |
| 7979       | Non-tumor           | 28.906                   | 27.31                | 26.978                   | 27.724                    | 29.562                | 22.292               | 31.566                 | 26.246                | 25.208                   |
| 7965       | Non-tumor           | 28.097                   | 27.611               | 27.562                   | 27.771                    | 29.027                | 21.701               | 29.968                 | 25.934                | 24.766                   |
| 6239       | Non-tumor           | 29.116                   | 30.681               | 29.331                   | 29.816                    | 36.96                 | 24.806               | 35.957                 | 30.101                | 30.021                   |
| 7674       | Non-tumor           | 30.387                   | 30.209               | 28.897                   | 30.131                    | 29.396                | 23.784               | 30.997                 | 29.412                | 28.563                   |
| 7681       | Non-tumor           | 30.065                   | 31.956               | 28.932                   | 29.055                    | 29.703                | 24.826               | 31.217                 | 28.994                | 29.404                   |
| 8638       | Non-tumor           | 29.892                   | 29.996               | 29.121                   | 30.328                    | 31.678                | 25.175               | 32.112                 | 29.066                | 28.559                   |
| 8650       | Non-tumor           | 29.953                   | 30.657               | 28.549                   | 30.832                    | 25.237                | 23.954               | 34.059                 | 27.97                 | 28.814                   |
| 8671       | Non-tumor           | 30.065                   | 31.956               | 28.932                   | 29.055                    | 33.556                | 24.826               | 34.644                 | 28.994                | 29.404                   |

| <b>IDs</b> | <b>Tumor status</b> | <b><u>miR-26b</u></b> | <b><u>miR-625#</u></b> | <b><u>miR-429</u></b> | <b><u>miR-106b</u></b> | <b><u>miR-1274A</u></b> | <b><u>miR-452</u></b> | <b><u>miR-28-3p</u></b> | <b><u>let-7e</u></b> | <b><u>let-7d</u></b> |
|------------|---------------------|-----------------------|------------------------|-----------------------|------------------------|-------------------------|-----------------------|-------------------------|----------------------|----------------------|
| 7514       | Tumor               | 24.155                | 29.55                  | 28.982                | 26.163                 | 22.674                  | 29.604                | 25.975                  | 26.039               | 27.562               |
| 7516       | Tumor               | 24.097                | 30.413                 | 29.863                | 25.807                 | 23.531                  | 28.962                | 26.051                  | 25.372               | 27.181               |
| 7518       | Tumor               | 24.957                | 28.224                 | 26.558                | 24.322                 | 19.348                  | 26.241                | 25.947                  | 25.552               | 27.061               |
| 7524       | Tumor               | 25.538                | 28.882                 | 37.456                | 26.175                 | 21.441                  | 27.725                | 25.888                  | 26.71                | 29.931               |
| 7526       | Tumor               | 23.931                | 28.924                 | 26.287                | 24.281                 | 20.939                  | 29.24                 | 25.636                  | 24.187               | 26.561               |
| 7528       | Tumor               | 24.178                | 29.181                 | 28.025                | 26.003                 | 22.925                  | 30.568                | 25.778                  | 24.701               | 27.625               |
| 7530       | Tumor               | 24.767                | 28.561                 | 24.56                 | 24.149                 | 21.681                  | 32.128                | 26.056                  | 25.308               | 27.235               |
| 7669       | Tumor               | 24.929                | 30.183                 | 30.566                | 26.5                   | 21.91                   | 29.552                | 26.551                  | 25.721               | 27.756               |
| 7980       | Tumor               | 23.843                | 30.298                 | 31.262                | 27.078                 | 22.423                  | 28.262                | 25.131                  | 25.152               | 27.797               |
| 7966       | Tumor               | 24.255                | 30.257                 | 31.561                | 26.227                 | 22.33                   | 27.634                | 26.204                  | 25.663               | 28.447               |
| 6240       | Tumor               | 26.775                | 29.771                 | 36.468                | 28.643                 | 19.909                  | 23.746                | 27.03                   | 25.777               | 36.42                |
| 7673       | Tumor               | 27.179                | 31.152                 | 32.575                | 28.41                  | 20.399                  | 23.171                | 27.257                  | 27.541               | 38.467               |
| 7682       | Tumor               | 26.773                | 30.096                 | 31.464                | 29.363                 | 19.652                  | 22.899                | 27.064                  | 26.409               | 31.988               |
| 8639       | Tumor               | 27.057                | 30.394                 | 30.796                | 27.939                 | 21.41                   | 20.763                | 27.008                  | 27.303               | 34.263               |
| 8651       | Tumor               | 27.822                | 30.884                 | 28.762                | 29.286                 | 19.953                  | 21.995                | 26.514                  | 27.367               | 34.437               |
| 8672       | Tumor               | 28.664                | 32.54                  | 32.038                | 30.278                 | 21.207                  | 23.471                | 27.55                   | 28.61                | 33.974               |
| 7513       | Non-tumor           | 24.263                | 29.911                 | 27.918                | 26.645                 | 22.284                  | 29.305                | 25.66                   | 25.68                | 28.373               |
| 7515       | Non-tumor           | 22.963                | 30.798                 | 27.69                 | 25.451                 | 22.551                  | 31.072                | 25.431                  | 23.278               | 26.157               |
| 7517       | Non-tumor           | 24.334                | 30.069                 | 29.583                | 26.764                 | 21.224                  | 31.061                | 25.931                  | 25.399               | 28.168               |
| 7523       | Non-tumor           | 24.611                | 29.526                 | 31.07                 | 27.357                 | 22.161                  | 30.469                | 25.866                  | 26.243               | 28.289               |
| 7525       | Non-tumor           | 24.484                | 29.352                 | 28.092                | 26.594                 | 23.591                  | 29.83                 | 25.87                   | 26.555               | 28.116               |
| 7527       | Non-tumor           | 23.457                | 29.209                 | 27.666                | 26.316                 | 20.342                  | 30.142                | 25.656                  | 24.686               | 27.404               |
| 7529       | Non-tumor           | 24.099                | 29.394                 | 27.639                | 26.377                 | 20.866                  | 29.933                | 25.692                  | 24.639               | 27.707               |
| 7670       | Non-tumor           | 24.018                | 30.227                 | 30.008                | 27.021                 | 21.778                  | 30.771                | 25.955                  | 24.864               | 28.154               |
| 7979       | Non-tumor           | 23.967                | 31.197                 | 29.749                | 27.127                 | 23.014                  | 32.303                | 26.45                   | 25.086               | 28.203               |
| 7965       | Non-tumor           | 23.761                | 29.562                 | 29.073                | 26.389                 | 21.443                  | 30.664                | 25.085                  | 24.666               | 27.52                |
| 6239       | Non-tumor           | 27.407                | 33.967                 | 30.668                | 30.374                 | 25.997                  | 24.525                | 27.227                  | 28.145               | 32.372               |
| 7674       | Non-tumor           | 25.818                | 30.143                 | 29.691                | 28.754                 | 20.75                   | 22.933                | 26.326                  | 23.716               | 32.418               |
| 7681       | Non-tumor           | 26.46                 | 30.049                 | 30.119                | 28.16                  | 20.889                  | 23.491                | 26.498                  | 26.775               | 32.284               |
| 8638       | Non-tumor           | 26.447                | 30.692                 | 31.319                | 30.047                 | 21.209                  | 22.874                | 26.621                  | 26.645               | 38.03                |
| 8650       | Non-tumor           | 26.894                | 30.477                 | 30.918                | 29.511                 | 20.105                  | 23.684                | 27.186                  | 27.17                | 18.697               |
| 8671       | Non-tumor           | 26.46                 | 31.943                 | 30.119                | 28.16                  | 21.828                  | 23.491                | 26.498                  | 26.775               | 32.284               |



| <b>IDs</b> | <b>Tumor status</b> | <b><u>miR-19b</u></b> | <b><u>miR-193b</u></b> | <b><u>miR-590-5p</u></b> | <b><u>miR-331</u></b> | <b><u>miR-16</u></b> | <b><u>miR-19a</u></b> | <b><u>miR-342-3p</u></b> | <b><u>miR-376a</u></b> | <b><u>miR-532</u></b> |
|------------|---------------------|-----------------------|------------------------|--------------------------|-----------------------|----------------------|-----------------------|--------------------------|------------------------|-----------------------|
| 7514       | Tumor               | 21.135                | 24.781                 | 28.35                    | 24.54                 | 21.923               | 24.716                | 24.353                   | 27.179                 | 26.614                |
| 7516       | Tumor               | 20.168                | 25.971                 | 28.837                   | 25.012                | 23.149               | 23.662                | 26.095                   | 33.367                 | 26.715                |
| 7518       | Tumor               | 21.557                | 25.497                 | 25.815                   | 24.164                | 23.488               | 23.989                | 25.534                   | 30.637                 | 25.765                |
| 7524       | Tumor               | 22.071                | 25.89                  | 26.941                   | 26.253                | 22.026               | 24.876                | 25.085                   | 33.01                  | 26.574                |
| 7526       | Tumor               | 20.063                | 24.442                 | 26.886                   | 23.838                | 21.614               | 23.381                | 24.551                   | 30.812                 | 25.142                |
| 7528       | Tumor               | 21.945                | 24.021                 | 27.311                   | 25.033                | 21.868               | 24.985                | 24.29                    | 30.536                 | 25.933                |
| 7530       | Tumor               | 21.577                | 25.435                 | 26.51                    | 24.526                | 21.194               | 24.786                | 24.04                    | 32.25                  | 24.81                 |
| 7669       | Tumor               | 20.959                | 24.866                 | 27.733                   | 25.99                 | 22.547               | 23.759                | 25.298                   | 30.956                 | 26.524                |
| 7980       | Tumor               | 21.799                | 24.775                 | 27.547                   | 26.242                | 22.489               | 24.807                | 25.544                   | 33.549                 | 26.903                |
| 7966       | Tumor               | 21.485                | 24.581                 | 27.329                   | 26.026                | 21.777               | 24.566                | 25.081                   | 32.248                 | 26.146                |
| 6240       | Tumor               | 23.167                | 24.416                 | 28.686                   | 27.567                | 23.074               | 28.262                | 29.16                    | 36.4                   | 28.514                |
| 7673       | Tumor               | 25.168                | 25.208                 | 29.007                   | 27.739                | 23.805               | 29.208                | 28.613                   | 33.876                 | 29.892                |
| 7682       | Tumor               | 23.711                | 24.238                 | 28.68                    | 26.275                | 23.052               | 27.822                | 26.079                   | 31.821                 | 29.096                |
| 8639       | Tumor               | 25.393                | 22.044                 | 28.215                   | 27.078                | 22.897               | 27.382                | 28.264                   | 32.306                 | 28.834                |
| 8651       | Tumor               | 23.987                | 23.703                 | 28.971                   | 27.633                | 22.435               | 29.973                | 28.382                   | 33.52                  | 30.078                |
| 8672       | Tumor               | 24.702                | 26.751                 | 31.393                   | 28.289                | 24.806               | 26.466                | 28.574                   | 32.758                 | 30.592                |
| 7513       | Non-tumor           | 22.285                | 25.2                   | 27.802                   | 25.544                | 22.488               | 25.319                | 24.576                   | 29.882                 | 26.874                |
| 7515       | Non-tumor           | 21.649                | 25.416                 | 27.42                    | 25.327                | 19.679               | 24.921                | 24.006                   | 31.061                 | 25.685                |
| 7517       | Non-tumor           | 21.969                | 24.664                 | 28.48                    | 25.864                | 22.739               | 25.424                | 24.835                   | 31.979                 | 26.846                |
| 7523       | Non-tumor           | 22.59                 | 25.294                 | 27.98                    | 26.406                | 21.978               | 25.632                | 24.663                   | 30.925                 | 26.828                |
| 7525       | Non-tumor           | 22.058                | 26.608                 | 28.654                   | 25.977                | 22.456               | 25.511                | 24.296                   | 30.915                 | 26.983                |
| 7527       | Non-tumor           | 21.537                | 24.942                 | 26.75                    | 25.686                | 22.017               | 23.857                | 24.073                   | 31.056                 | 26.366                |
| 7529       | Non-tumor           | 22.042                | 25.14                  | 27.36                    | 25.515                | 21.968               | 24.746                | 24.15                    | 30.768                 | 26.35                 |
| 7670       | Non-tumor           | 22.119                | 24.709                 | 28.009                   | 25.475                | 22.796               | 25.295                | 25.057                   | 31.631                 | 27.08                 |
| 7979       | Non-tumor           | 22.101                | 25.394                 | 28.064                   | 26.956                | 22.038               | 25.938                | 26.58                    | 31.623                 | 27.262                |
| 7965       | Non-tumor           | 21.613                | 24.622                 | 27.549                   | 24.974                | 21.998               | 24.954                | 24.772                   | 30.038                 | 26.651                |
| 6239       | Non-tumor           | 26.941                | 25.499                 | 30.821                   | 27.577                | 24.687               | 30.802                | 27.501                   | 33.643                 | 30.681                |
| 7674       | Non-tumor           | 24.962                | 24.42                  | 28.986                   | 26.895                | 23.256               | 27.598                | 25.797                   | 30.395                 | 29.995                |
| 7681       | Non-tumor           | 24.203                | 24.754                 | 29.209                   | 27.243                | 27.043               | 28.149                | 26.416                   | 33.353                 | 29.593                |
| 8638       | Non-tumor           | 23.648                | 24.817                 | 29.256                   | 27.957                | 23.888               | 28.298                | 28.349                   | 32.789                 | 30.337                |
| 8650       | Non-tumor           | 23.983                | 25.091                 | 29.13                    | 28.3                  | 24.052               | 28.778                | 28.789                   | 33.185                 | 30.225                |
| 8671       | Non-tumor           | 24.203                | 24.754                 | 29.209                   | 27.243                | 27.043               | 28.149                | 26.416                   | 33.353                 | 29.593                |

| <b>IDs</b> | <b>Tumor status</b> | <b><u>miR-142-3p</u></b> | <b><u>miR-365</u></b> | <b><u>miR-148a</u></b> | <b><u>miR-25</u></b> | <b><u>U6 snRNA</u></b> | <b><u>miR-143</u></b> | <b><u>miR-30e-3p</u></b> | <b><u>miR-99b</u></b> | <b><u>miR-328</u></b> |
|------------|---------------------|--------------------------|-----------------------|------------------------|----------------------|------------------------|-----------------------|--------------------------|-----------------------|-----------------------|
| 7514       | Tumor               | 25.479                   | 27.847                | 25.73                  | 28.057               | 20.467                 | 24.476                | 25.637                   | 29.3                  | 29.692                |
| 7516       | Tumor               | 25.768                   | 28.37                 | 25.355                 | 27.994               | 20.733                 | 25.715                | 25.836                   | 30.484                | 30.911                |
| 7518       | Tumor               | 26.607                   | 27.714                | 25.305                 | 26.016               | 19.852                 | 26.308                | 25.627                   | 28.007                | 29.079                |
| 7524       | Tumor               | 25.068                   | 28.31                 | 25.452                 | 27.881               | 21.134                 | 26.652                | 27.14                    | 32.532                | 31.917                |
| 7526       | Tumor               | 24.045                   | 25.877                | 23.983                 | 26.538               | 20.251                 | 23.545                | 25.857                   | 28.575                | 29.279                |
| 7528       | Tumor               | 24.063                   | 26.568                | 24.988                 | 27.836               | 20.134                 | 23.052                | 24.953                   | 28.033                | 29.26                 |
| 7530       | Tumor               | 23.567                   | 26.894                | 26.069                 | 25.59                | 20.455                 | 24.495                | 24.618                   | 29.154                | 29.199                |
| 7669       | Tumor               | 25.753                   | 29.145                | 25.586                 | 27.997               | 21.594                 | 23.889                | 26.67                    | 29.011                | 30.132                |
| 7980       | Tumor               | 27.798                   | 27.704                | 26.23                  | 27.928               | 20.818                 | 26.154                | 25.598                   | 31.064                | 29.226                |
| 7966       | Tumor               | 25.709                   | 27.942                | 24.543                 | 27.495               | 21.162                 | 24.438                | 25.818                   | 30.456                | 30.235                |
| 6240       | Tumor               | 35.132                   | 27.307                | 29.002                 | 29.684               | 22.407                 | 30.926                | 28.024                   | 35.041                | 30.775                |
| 7673       | Tumor               | 30.647                   | 28.147                | 31.109                 | 31.195               | 22.148                 | 29.551                | 27.299                   | 33.258                | 32.193                |
| 7682       | Tumor               | 29.337                   | 27.295                | 28.379                 | 30.715               | 22.509                 | 27.288                | 27.69                    | 30.998                | 31.136                |
| 8639       | Tumor               | 28.325                   | 28.237                | 30.947                 | 29.377               | 23.021                 | 28.57                 | 27.184                   | 31.013                | 33.097                |
| 8651       | Tumor               | 29.468                   | 29.889                | 31.633                 | 30.338               | 23.398                 | 27.691                | 24.924                   | 30.591                | 34.525                |
| 8672       | Tumor               | 31.248                   | 29.062                | 30.653                 | 31.026               | 24.473                 | 28.812                | 29.377                   | 31.565                | 33.769                |
| 7513       | Non-tumor           | 24.986                   | 28.56                 | 26.172                 | 28.279               | 21.803                 | 23.469                | 24.935                   | 28.962                | 30.282                |
| 7515       | Non-tumor           | 24.802                   | 27.98                 | 25.757                 | 26.524               | 20.816                 | 20.965                | 25.049                   | 26.964                | 29.041                |
| 7517       | Non-tumor           | 25.2                     | 27.151                | 24.922                 | 28.254               | 21.03                  | 25.14                 | 25.273                   | 30.002                | 29.293                |
| 7523       | Non-tumor           | 25.082                   | 28.268                | 25.285                 | 28.337               | 21.546                 | 24.976                | 25.485                   | 30.134                | 30.67                 |
| 7525       | Non-tumor           | 24.764                   | 29.907                | 26.783                 | 29.241               | 21.598                 | 24.17                 | 25.331                   | 29.294                | 30.069                |
| 7527       | Non-tumor           | 23.667                   | 27.733                | 25.906                 | 27.348               | 19.726                 | 23.853                | 24.918                   | 29.022                | 29.365                |
| 7529       | Non-tumor           | 24.114                   | 28.262                | 25.863                 | 28.227               | 21.553                 | 23.408                | 25.157                   | 28.767                | 29.547                |
| 7670       | Non-tumor           | 25.177                   | 27.123                | 24.643                 | 27.889               | 20.86                  | 24.682                | 24.82                    | 29.966                | 29.131                |
| 7979       | Non-tumor           | 25.655                   | 28.635                | 24.672                 | 27.751               | 20.616                 | 25.933                | 25.142                   | 31.213                | 33.656                |
| 7965       | Non-tumor           | 24.047                   | 26.54                 | 23.628                 | 27.686               | 21.037                 | 24.531                | 24.554                   | 29.492                | 28.678                |
| 6239       | Non-tumor           | 30.906                   | 27.39                 | 29.476                 | 31.377               | 23.473                 | 29.881                | 28.962                   | 32.863                | 32.146                |
| 7674       | Non-tumor           | 28.345                   | 27.411                | 27.279                 | 31.137               | 23.409                 | 27.165                | 27.43                    | 30.687                | 31.213                |
| 7681       | Non-tumor           | 29.575                   | 25.62                 | 29.116                 | 30.693               | 22.884                 | 27.909                | 27.424                   | 30.189                | 30.339                |
| 8638       | Non-tumor           | 27.166                   | 26.865                | 26.929                 | 29.601               | 23.263                 | 27.834                | 26.868                   | 31.936                | 31.408                |
| 8650       | Non-tumor           | 30.395                   | 27.845                | 28.197                 | 30.519               | 23.297                 | 28.633                | 26.89                    | 31.683                | 32.115                |
| 8671       | Non-tumor           | 29.575                   | 25.62                 | 29.116                 | 30.693               | 23.772                 | 27.909                | 27.885                   | 30.189                | 30.339                |

| IDs  | Tumor status | <a href="#">miR-324-3p</a> | <a href="#">miR-374</a> | <a href="#">miR-125a-5p</a> | <a href="#">miR-628-5p</a> | <a href="#">miR-149</a> | <a href="#">miR-146b</a> | <a href="#">miR-34a#</a> | <a href="#">miR-20a</a> | <a href="#">miR-218</a> |
|------|--------------|----------------------------|-------------------------|-----------------------------|----------------------------|-------------------------|--------------------------|--------------------------|-------------------------|-------------------------|
| 7514 | Tumor        | 28.794                     | 28.214                  | 28.098                      | 30.107                     | 30.48                   | 20.949                   | 29.055                   | 22.346                  | 27.081                  |
| 7516 | Tumor        | 29.113                     | 28.459                  | 29.641                      | 30.504                     | 33.51                   | 21.833                   | 29.464                   | 21.491                  | 29.964                  |
| 7518 | Tumor        | 29.206                     | 26.332                  | 26.256                      | 30.319                     | 28.326                  | 26.182                   | 28.968                   | 22.209                  | 29.683                  |
| 7524 | Tumor        | 30.673                     | 27.927                  | 30.577                      | 32.058                     | 30.633                  | 24.318                   | 28.099                   | 23.842                  | 31.755                  |
| 7526 | Tumor        | 28.296                     | 26.313                  | 27.061                      | 29.435                     | 27.659                  | 23.319                   | 27.872                   | 21.343                  | 26.127                  |
| 7528 | Tumor        | 29.152                     | 26.608                  | 26.467                      | 30.771                     | 28.916                  | 23.841                   | 27.664                   | 22.899                  | 26.67                   |
| 7530 | Tumor        | 28.789                     | 26.617                  | 27.635                      | 29.477                     | 28.092                  | 23.27                    | 27.557                   | 23.083                  | 28.262                  |
| 7669 | Tumor        | 29.936                     | 28.118                  | 27.685                      | 30.776                     | 30.672                  | 24.703                   | 29.187                   | 22.394                  | 27.739                  |
| 7980 | Tumor        | 29.713                     | 27.567                  | 29.128                      | 30.702                     | 32.053                  | 19.674                   | 28.677                   | 22.95                   | 29.301                  |
| 7966 | Tumor        | 30.117                     | 28.252                  | 29.077                      | 31.006                     | 33.785                  | 24.339                   | 28.396                   | 23.06                   | 28.073                  |
| 6240 | Tumor        | 31.983                     | 29.228                  | 28.282                      | 28.555                     | 33.26                   | 27.192                   | 29.675                   | 26.336                  | 32.776                  |
| 7673 | Tumor        | 32.061                     | 28.645                  | 30.518                      | 29.416                     | 32.307                  | 22.6                     | 29.277                   | 27.858                  | 32.791                  |
| 7682 | Tumor        | 30.831                     | 28.646                  | 29.024                      | 29.344                     | 31.79                   | 22.307                   | 29.048                   | 26.076                  | 29.44                   |
| 8639 | Tumor        | 32.144                     | 29.011                  | 29.196                      | 30.157                     | 30.819                  | 24.145                   | 30.727                   | 26.75                   | 30.538                  |
| 8651 | Tumor        | 31.974                     | 30.16                   | 29.914                      | 30.518                     | 34.492                  | 24.901                   | 30.534                   | 25.764                  | 31.019                  |
| 8672 | Tumor        | 32.925                     | 30.36                   | 29.947                      | 28.312                     | 32.257                  | 25.802                   | 30.588                   | 26.58                   | 30.301                  |
| 7513 | Non-tumor    | 30.091                     | 27.669                  | 27.97                       | 30.276                     | 30.371                  | 23.047                   | 28.127                   | 23.894                  | 27.776                  |
| 7515 | Non-tumor    | 27.436                     | 26.257                  | 25.598                      | 29.436                     | 27.727                  | 22.704                   | 27.872                   | 22.384                  | 26.695                  |
| 7517 | Non-tumor    | 30.274                     | 27.472                  | 28.062                      | 31.8                       | 30.522                  | 22.954                   | 28.886                   | 23.476                  | 29.227                  |
| 7523 | Non-tumor    | 30.494                     | 28.075                  | 28.546                      | 31.082                     | 30.216                  | 23.082                   | 29.225                   | 24.188                  | 28.538                  |
| 7525 | Non-tumor    | 30.057                     | 28.149                  | 28.293                      | 30.265                     | 29.903                  | 22.935                   | 29.272                   | 24.026                  | 27.429                  |
| 7527 | Non-tumor    | 29.485                     | 27.022                  | 27.088                      | 30.951                     | 29.316                  | 22.013                   | 28.093                   | 22.671                  | 27.229                  |
| 7529 | Non-tumor    | 29.897                     | 27.039                  | 27.301                      | 29.964                     | 29.925                  | 22.498                   | 28.383                   | 23.531                  | 27.238                  |
| 7670 | Non-tumor    | 30.258                     | 27.331                  | 28.098                      | 30.661                     | 29.954                  | 24.154                   | 29.262                   | 23.482                  | 28.994                  |
| 7979 | Non-tumor    | 28.794                     | 28.724                  | 29.106                      | 29.74                      | 32.311                  | 23.16                    | 29.941                   | 23.304                  | 30.004                  |
| 7965 | Non-tumor    | 29.628                     | 26.781                  | 27.566                      | 30.12                      | 29.482                  | 21.937                   | 28.231                   | 22.6                    | 28.053                  |
| 6239 | Non-tumor    | 34.549                     | 29.328                  | 31.739                      | 29.097                     | 34.204                  | 25.497                   | 31.964                   | 27.017                  | 32.577                  |
| 7674 | Non-tumor    | 31.704                     | 27.832                  | 27.258                      | 28.861                     | 31.337                  | 22.568                   | 28.836                   | 25.697                  | 28.45                   |
| 7681 | Non-tumor    | 32.299                     | 28.432                  | 28.831                      | 28.893                     | 30.169                  | 23.441                   | 29.198                   | 25.575                  | 29.982                  |
| 8638 | Non-tumor    | 33.356                     | 28.553                  | 29.535                      | 29.109                     | 32.167                  | 24.549                   | 30.303                   | 28.824                  | 30.077                  |
| 8650 | Non-tumor    | 32.233                     | 28.805                  | 28.998                      | 28.249                     | 33.399                  | 24.971                   | 30.284                   | 26.683                  | 31.823                  |
| 8671 | Non-tumor    | 32.299                     | 28.432                  | 28.831                      | 28.893                     | 30.169                  | 23.441                   | 31.352                   | 25.575                  | 29.982                  |

| <b>IDs</b> | <b>Tumor status</b> | <b><u>miR-151-3p</u></b> | <b><u>miR-126#</u></b> | <b><u>let-7g</u></b> | <b><u>miR-664</u></b> | <b><u>miR-886-5p</u></b> | <b><u>miR-378</u></b> | <b><u>miR-30a-5p</u></b> | <b><u>miR-132</u></b> | <b><u>miR-340#</u></b> |
|------------|---------------------|--------------------------|------------------------|----------------------|-----------------------|--------------------------|-----------------------|--------------------------|-----------------------|------------------------|
| 7514       | Tumor               | 23.177                   | 24.902                 | 24.912               | 28.565                | 31.258                   | 25.77                 | 23.452                   | 26.854                | 30                     |
| 7516       | Tumor               | 22.416                   | 24.863                 | 24.46                | 27.949                | 30.207                   | 26.755                | 24.185                   | 29.722                | 30.457                 |
| 7518       | Tumor               | 22.625                   | 24.787                 | 24.986               | 27.668                | 27.6                     | 25.811                | 25.357                   | 27.545                | 28.06                  |
| 7524       | Tumor               | 22.762                   | 25.51                  | 25.657               | 28.974                | 30.967                   | 24.762                | 24.546                   | 28.795                | 30.945                 |
| 7526       | Tumor               | 22.885                   | 23.593                 | 23.765               | 26.637                | 30.015                   | 25.905                | 21.963                   | 26.376                | 28.109                 |
| 7528       | Tumor               | 22.831                   | 22.97                  | 24.598               | 27.273                | 27.399                   | 24.288                | 23.177                   | 25.882                | 29.738                 |
| 7530       | Tumor               | 22.54                    | 25.246                 | 24.643               | 27.099                | 28.966                   | 25.5                  | 23.833                   | 26.308                | 30.315                 |
| 7669       | Tumor               | 22.978                   | 23.863                 | 25.461               | 27.987                | 30.875                   | 26.5                  | 24.137                   | 26.815                | 31.157                 |
| 7980       | Tumor               | 22.79                    | 29.918                 | 24.77                | 27.439                | 30.903                   | 23.501                | 24.467                   | 27.016                | 30.982                 |
| 7966       | Tumor               | 22.393                   | 24.334                 | 24.455               | 28.35                 | 32.258                   | 24.641                | 24.516                   | 28.145                | 31.001                 |
| 6240       | Tumor               | 28.524                   | 28.624                 | 30.998               | 26.975                | 33.993                   | 17.713                | 26.413                   | 29.773                | 32.634                 |
| 7673       | Tumor               | 27.489                   | 26.082                 | 28.034               | 26.748                | 31.887                   | 17.665                | 24.853                   | 28.338                | 32.483                 |
| 7682       | Tumor               | 27.019                   | 25.524                 | 27.242               | 26.61                 | 31.368                   | 17.71                 | 25.43                    | 27.951                | 31.005                 |
| 8639       | Tumor               | 26.735                   | 26.753                 | 28.908               | 28.784                | 32.491                   | 17.708                | 25.607                   | 27.935                | 31.74                  |
| 8651       | Tumor               | 27.696                   | 26.891                 | 29.762               | 28.761                | 28.917                   | 17.785                | 24.365                   | 27.953                | 33.821                 |
| 8672       | Tumor               | 27.598                   | 27.054                 | 28.904               | 29.291                | 33.979                   | 17.983                | 26.72                    | 30.072                | 33.772                 |
| 7513       | Non-tumor           | 23.123                   | 24.521                 | 24.54                | 28.159                | 29.494                   | 24.156                | 24.184                   | 27.37                 | 29.934                 |
| 7515       | Non-tumor           | 23.795                   | 22.98                  | 23.505               | 28.011                | 27.161                   | 25.151                | 23.923                   | 24.748                | 30.952                 |
| 7517       | Non-tumor           | 23.019                   | 24.622                 | 24.954               | 27.954                | 30.389                   | 23.99                 | 24.103                   | 27.801                | 30.38                  |
| 7523       | Non-tumor           | 22.733                   | 25.413                 | 25.283               | 28.278                | 30.41                    | 23.615                | 24.169                   | 26.832                | 30.247                 |
| 7525       | Non-tumor           | 23.134                   | 25.243                 | 24.718               | 28.643                | 28.206                   | 24.994                | 24.97                    | 28.478                | 31.019                 |
| 7527       | Non-tumor           | 22.662                   | 23.123                 | 23.987               | 27.15                 | 28.589                   | 24.003                | 23.495                   | 25.963                | 29.843                 |
| 7529       | Non-tumor           | 23.274                   | 23.599                 | 23.967               | 27.973                | 29.947                   | 23.907                | 23.98                    | 26.44                 | 30.461                 |
| 7670       | Non-tumor           | 23.458                   | 24.222                 | 24.581               | 27.569                | 32.718                   | 23.067                | 24.292                   | 27.482                | 29.172                 |
| 7979       | Non-tumor           | 23.009                   | 24.787                 | 24.901               | 28.807                | 29.136                   | 24.242                | 25.139                   | 27.304                | 30.623                 |
| 7965       | Non-tumor           | 23.032                   | 24.964                 | 24.475               | 27.534                | 31.444                   | 23.757                | 23.642                   | 26.673                | 29.349                 |
| 6239       | Non-tumor           | 30.956                   | 28.969                 | 28.189               | 28.993                | 33.105                   | 16.963                | 28.984                   | 30.118                | 33.993                 |
| 7674       | Non-tumor           | 27.52                    | 25.473                 | 27.224               | 26.993                | 32.335                   | 17.594                | 25.485                   | 27.83                 | 30.283                 |
| 7681       | Non-tumor           | 27.608                   | 26.116                 | 27.253               | 27.246                | 33.022                   | 17.816                | 26.069                   | 27.968                | 30.961                 |
| 8638       | Non-tumor           | 28.328                   | 25.626                 | 27.345               | 28.147                | 38.362                   | 17.889                | 26.39                    | 28.103                | 31.11                  |
| 8650       | Non-tumor           | 28.373                   | 26.267                 | 31.122               | 27.547                | 34.67                    | 17.881                | 27.148                   | 29.776                | 29.949                 |
| 8671       | Non-tumor           | 28.941                   | 28.345                 | 27.253               | 29.018                | 33.022                   | 17.852                | 22.203                   | 27.968                | 32.84                  |

| <b>IDs</b> | <b>Tumor status</b> | <b><u>miR-212</u></b> | <b><u>miR-24</u></b> | <b><u>miR-152</u></b> | <b><u>miR-339-5p</u></b> | <b><u>miR-126</u></b> | <b><u>miR-29c</u></b> | <b><u>let-7a</u></b> | <b><u>miR-155</u></b> | <b><u>miR-20b</u></b> |
|------------|---------------------|-----------------------|----------------------|-----------------------|--------------------------|-----------------------|-----------------------|----------------------|-----------------------|-----------------------|
| 7514       | Tumor               | 29.95                 | 21.605               | 26.698                | 31.525                   | 20.442                | 28.204                | 28.018               | 25.383                | 29.018                |
| 7516       | Tumor               | 33.63                 | 22.564               | 26.216                | 30.181                   | 20.245                | 28.122                | 27.721               | 26.724                | 27.579                |
| 7518       | Tumor               | 31.919                | 23.14                | 27.466                | 29.483                   | 21.333                | 29.694                | 28.459               | 27.537                | 26.331                |
| 7524       | Tumor               | 35.874                | 23.006               | 29.538                | 30.445                   | 21.625                | 27.85                 | 30.066               | 25.859                | 29.664                |
| 7526       | Tumor               | 31.596                | 21.15                | 25.697                | 30.229                   | 19.411                | 27.442                | 26.791               | 25.833                | 28.019                |
| 7528       | Tumor               | 29.744                | 20.939               | 27.444                | 30.785                   | 19.189                | 27.094                | 27.213               | 26.151                | 28.99                 |
| 7530       | Tumor               | 30.823                | 20.969               | 27.657                | 30.188                   | 21.133                | 27.623                | 27.859               | 23.825                | 28.967                |
| 7669       | Tumor               | 31.453                | 22.214               | 27.674                | 30.787                   | 19.983                | 27.78                 | 27.727               | 26.763                | 28.932                |
| 7980       | Tumor               | 31.08                 | 22.272               | 27.987                | 29.744                   | 21.043                | 28.316                | 27.776               | 28.121                | 30.189                |
| 7966       | Tumor               | 31.577                | 22.215               | 27.473                | 29.706                   | 20.307                | 27.32                 | 28.438               | 27.053                | 28.839                |
| 6240       | Tumor               | 30.295                | 23.876               | 31.026                | 32.437                   | 24.235                | 31.046                | 32.353               | 28.375                | 32.3                  |
| 7673       | Tumor               | 29.27                 | 23.464               | 29.728                | 34.913                   | 22.299                | 29.015                | 26.473               | 28.009                | 35.519                |
| 7682       | Tumor               | 28.981                | 22.459               | 28.128                | 35.175                   | 21.199                | 29.392                | 30.144               | 27.342                | 31.528                |
| 8639       | Tumor               | 29.948                | 22.339               | 29.84                 | 36.719                   | 23.366                | 29.218                | 29.263               | 27.794                | 30.936                |
| 8651       | Tumor               | 28.299                | 23.019               | 31.373                | 33.352                   | 22.968                | 29.664                | 31.501               | 27.658                | 31.984                |
| 8672       | Tumor               | 33.306                | 23.622               | 31.105                | 34.504                   | 22.68                 | 31.508                | 31.74                | 29.172                | 30.722                |
| 7513       | Non-tumor           | 31.191                | 22.007               | 26.963                | 30.988                   | 20.791                | 27.632                | 27.652               | 26.734                | 29.684                |
| 7515       | Non-tumor           | 28.985                | 20.162               | 26.009                | 30.471                   | 18.959                | 26.864                | 26.016               | 25.088                | 25.819                |
| 7517       | Non-tumor           | 31.688                | 22.19                | 27.25                 | 30.359                   | 20.541                | 28.081                | 27.797               | 28.045                | 29.158                |
| 7523       | Non-tumor           | 30.795                | 22.059               | 27.41                 | 30.916                   | 20.842                | 28.242                | 28.64                | 26.162                | 29.261                |
| 7525       | Non-tumor           | 32.064                | 22.158               | 27.158                | 31.499                   | 20.801                | 27.79                 | 28.234               | 25.57                 | 29.658                |
| 7527       | Non-tumor           | 30.067                | 21.582               | 26.99                 | 30.266                   | 20.175                | 26.493                | 26.862               | 25.494                | 28.709                |
| 7529       | Non-tumor           | 29.926                | 21.576               | 26.98                 | 30.975                   | 19.931                | 27.308                | 27.511               | 25.335                | 28.473                |
| 7670       | Non-tumor           | 31.774                | 22.162               | 26.921                | 32.052                   | 20.645                | 27.683                | 27.591               | 27.958                | 29.972                |
| 7979       | Non-tumor           | 33.651                | 22.134               | 27.124                | 32.423                   | 20.594                | 27.78                 | 27.533               | 28.526                | 28.579                |
| 7965       | Non-tumor           | 31.381                | 21.907               | 26.393                | 30.208                   | 20.166                | 27.475                | 27.026               | 27.506                | 28.845                |
| 6239       | Non-tumor           | 31.268                | 23.564               | 31.549                | 38.271                   | 23.149                | 31.723                | 34.363               | 29.72                 | 35.259                |
| 7674       | Non-tumor           | 30.019                | 22.207               | 30.097                | 32.672                   | 21.634                | 28.99                 | 36.412               | 27.115                | 31.336                |
| 7681       | Non-tumor           | 29.915                | 22.881               | 29.477                | 34.027                   | 22.625                | 29.464                | 22.625               | 26.911                | 31.862                |
| 8638       | Non-tumor           | 30.479                | 23.18                | 30.604                | 35.012                   | 21.558                | 29.66                 | 30.421               | 29.058                | 32.987                |
| 8650       | Non-tumor           | 29.017                | 23.233               | 28.765                | 33.725                   | 22.191                | 30.338                | 31.249               | 30.027                | 35.627                |
| 8671       | Non-tumor           | 29.915                | 22.881               | 29.477                | 34.027                   | 22.625                | 29.464                | 22.625               | 26.911                | 31.862                |

| <b>IDs</b> | <b>Tumor status</b> | <b><u>miR-27a</u></b> | <b><u>miR-181a</u></b> | <b><u>mmu-miR-374-5p</u></b> | <b><u>miR-151-5P</u></b> | <b><u>miR-744</u></b> | <b><u>miR-518f</u></b> | <b><u>miR-30a-3p</u></b> | <b><u>miR-26a</u></b> | <b><u>miR-34a</u></b> |
|------------|---------------------|-----------------------|------------------------|------------------------------|--------------------------|-----------------------|------------------------|--------------------------|-----------------------|-----------------------|
| 7514       | Tumor               | 26.444                | 29.389                 | 27.226                       | 28.052                   | 28.302                | 31.2                   | 24.924                   | 22.696                | 26.004                |
| 7516       | Tumor               | 27.857                | 29.913                 | 27.64                        | 27.794                   | 29.311                | 30.227                 | 26.181                   | 22.881                | 26.332                |
| 7518       | Tumor               | 27.956                | 30.681                 | 24.876                       | 27.29                    | 27.864                | 30.998                 | 25.442                   | 23.464                | 27.471                |
| 7524       | Tumor               | 28.293                | 31.703                 | 26.856                       | 27.557                   | 29.39                 | 32.21                  | 27.485                   | 24.373                | 24.756                |
| 7526       | Tumor               | 25.477                | 28.114                 | 25.537                       | 26.598                   | 27.313                | 29.151                 | 25.716                   | 22.201                | 25.256                |
| 7528       | Tumor               | 24.855                | 29.907                 | 21.255                       | 27.249                   | 28.573                | 29.211                 | 24.793                   | 22.66                 | 24.835                |
| 7530       | Tumor               | 24.844                | 29.384                 | 25.847                       | 27.366                   | 26.805                | 30.381                 | 23.848                   | 23.623                | 24.828                |
| 7669       | Tumor               | 26.532                | 29.966                 | 27.267                       | 27.937                   | 29.532                | 30.308                 | 27.189                   | 23.182                | 26.038                |
| 7980       | Tumor               | 28.321                | 31.082                 | 25.821                       | 28.386                   | 29.494                | 29.483                 | 26.798                   | 23.476                | 26.081                |
| 7966       | Tumor               | 26.674                | 31.036                 | 26.614                       | 27.584                   | 29.521                | 30.836                 | 25.932                   | 23.555                | 25.355                |
| 6240       | Tumor               | 30.635                | 34.965                 | 25.701                       | 31.241                   | 32.01                 | 23.182                 | 29.008                   | 24.891                | 29.654                |
| 7673       | Tumor               | 29.814                | 30.549                 | 25.933                       | 30.859                   | 31.173                | 23.557                 | 27.32                    | 25.432                | 29.137                |
| 7682       | Tumor               | 28.724                | 33.604                 | 26.065                       | 30.625                   | 30.525                | 23.796                 | 27.612                   | 24.751                | 28.878                |
| 8639       | Tumor               | 28.528                | 31.698                 | 26.083                       | 31.097                   | 30.577                | 23.928                 | 22.943                   | 24.955                | 30.648                |
| 8651       | Tumor               | 27.113                | 31.539                 | 27.392                       | 32.498                   | 32.431                | 24.207                 | 23.725                   | 24.547                | 28.548                |
| 8672       | Tumor               | 30.357                | 33.918                 | 26.446                       | 31.087                   | 31.521                | 22.833                 | 27.315                   | 25.494                | 29.552                |
| 7513       | Non-tumor           | 26.514                | 30.274                 | 26.721                       | 27.942                   | 29.356                | 30.932                 | 24.742                   | 22.898                | 25.362                |
| 7515       | Non-tumor           | 24.046                | 28.749                 | 25.218                       | 26.682                   | 28.363                | 27.983                 | 24.159                   | 21.295                | 24.615                |
| 7517       | Non-tumor           | 27.217                | 30.668                 | 26.3                         | 28.049                   | 29.061                | 29.604                 | 25.504                   | 23.334                | 26.478                |
| 7523       | Non-tumor           | 26.87                 | 30.992                 | 27.241                       | 28.481                   | 29.343                | 30.393                 | 25.207                   | 23.43                 | 26.64                 |
| 7525       | Non-tumor           | 26.411                | 29.651                 | 27.037                       | 28.159                   | 28.726                | 29.452                 | 25.023                   | 23.084                | 25.935                |
| 7527       | Non-tumor           | 25.709                | 29.766                 | 25.272                       | 27.416                   | 29.273                | 31.943                 | 24.624                   | 22.393                | 25.224                |
| 7529       | Non-tumor           | 26.165                | 30.011                 | 25.081                       | 27.841                   | 28.738                | 30.669                 | 24.942                   | 22.658                | 25.384                |
| 7670       | Non-tumor           | 27.097                | 31.048                 | 25.806                       | 27.457                   | 28.512                | 30.106                 | 24.822                   | 22.99                 | 26.996                |
| 7979       | Non-tumor           | 27.254                | 29.994                 | 22.444                       | 28.093                   | 28.574                | 27.665                 | 25.514                   | 23.311                | 26.758                |
| 7965       | Non-tumor           | 26.095                | 29.522                 | 25.452                       | 27.314                   | 28.306                | 28.346                 | 24.442                   | 33.664                | 25.376                |
| 6239       | Non-tumor           | 30.451                | 33.326                 | 25.305                       | 33.982                   | 33.521                | 23.552                 | 28.961                   | 25.598                | 31.775                |
| 7674       | Non-tumor           | 28.163                | 31.135                 | 27.273                       | 31.248                   | 31.245                | 23.355                 | 28.038                   | 24.183                | 29.278                |
| 7681       | Non-tumor           | 28.216                | 31.623                 | 25.421                       | 31.064                   | 31.501                | 23.527                 | 26.067                   | 24.454                | 29.075                |
| 8638       | Non-tumor           | 29.663                | 33.962                 | 26.085                       | 31.211                   | 31.805                | 22.872                 | 26.139                   | 24.608                | 30.362                |
| 8650       | Non-tumor           | 29.231                | 30.798                 | 26.895                       | 31.232                   | 30.591                | 23.105                 | 26.925                   | 24.936                | 30.184                |
| 8671       | Non-tumor           | 28.216                | 31.623                 | 25.421                       | 32.51                    | 31.501                | 23.527                 | 27.349                   | 24.454                | 29.075                |

| IDs  | Tumor status | <a href="#">miR-409-3p</a> | <a href="#">miR-494</a> | <a href="#">miR-30c</a> | <a href="#">miR-92a</a> | <a href="#">miR-660</a> | <a href="#">miR-28</a> | <a href="#">miR-22#</a> | <a href="#">miR-191</a> | <a href="#">rno-miR-7#</a> |
|------|--------------|----------------------------|-------------------------|-------------------------|-------------------------|-------------------------|------------------------|-------------------------|-------------------------|----------------------------|
| 7514 | Tumor        | 24.859                     | 27.469                  | 23.26                   | 25.263                  | 27.024                  | 27.748                 | 32.457                  | 22.288                  | 30.268                     |
| 7516 | Tumor        | 31.788                     | 27.58                   | 23.362                  | 24.962                  | 26.644                  | 27.415                 | 31.932                  | 22.837                  | 29.966                     |
| 7518 | Tumor        | 27.971                     | 29.106                  | 23.024                  | 25.463                  | 26.709                  | 27.45                  | 31.253                  | 22.374                  | 28.364                     |
| 7524 | Tumor        | 31.085                     | 27.281                  | 23.974                  | 27.584                  | 27.157                  | 27.12                  | 32.711                  | 23.034                  | 28.439                     |
| 7526 | Tumor        | 27.955                     | 28.667                  | 22.499                  | 25.187                  | 25.372                  | 26.235                 | 31.194                  | 21.68                   | 30.095                     |
| 7528 | Tumor        | 26.811                     | 29.336                  | 22.72                   | 25.982                  | 26.29                   | 27.137                 | 30.834                  | 22.711                  | 28.883                     |
| 7530 | Tumor        | 28.639                     | 28.349                  | 22.614                  | 26.099                  | 25.434                  | 27.282                 | 31.177                  | 22.021                  | 28.93                      |
| 7669 | Tumor        | 28.7                       | 27.669                  | 23.569                  | 24.969                  | 26.922                  | 28.216                 | 31.292                  | 23.649                  | 30.9                       |
| 7980 | Tumor        | 30.717                     | 29.681                  | 23.436                  | 25.416                  | 27.163                  | 26.876                 | 31.451                  | 22.639                  | 30.02                      |
| 7966 | Tumor        | 29.13                      | 27.365                  | 23.63                   | 26.252                  | 26.623                  | 27.964                 | 32.72                   | 23.164                  | 29.24                      |
| 6240 | Tumor        | 35.936                     | 36.178                  | 25.125                  | 27.817                  | 29.058                  | 29.623                 | 27.558                  | 24.5                    | 30.184                     |
| 7673 | Tumor        | 32.441                     | 32.813                  | 25.931                  | 30.548                  | 31.422                  | 31.1                   | 26.789                  | 24.488                  | 30.936                     |
| 7682 | Tumor        | 28.778                     | 32.524                  | 25.289                  | 28.454                  | 30.536                  | 30.574                 | 27.815                  | 23.337                  | 31.569                     |
| 8639 | Tumor        | 30.962                     | 30.89                   | 24.896                  | 29.369                  | 30.324                  | 31.172                 | 29.518                  | 22.986                  | 31.067                     |
| 8651 | Tumor        | 32.164                     | 30.871                  | 24.266                  | 28.626                  | 30.807                  | 30.868                 | 31.164                  | 24.104                  | 33.264                     |
| 8672 | Tumor        | 30.66                      | 31.942                  | 25.698                  | 29.229                  | 32.213                  | 31.731                 | 33.009                  | 24.425                  | 37.864                     |
| 7513 | Non-tumor    | 27.041                     | 27.57                   | 23.368                  | 26.679                  | 27.01                   | 27.423                 | 31.426                  | 22.975                  | 29.729                     |
| 7515 | Non-tumor    | 28.513                     | 27.927                  | 22.623                  | 25.596                  | 25.953                  | 25.953                 | 31.172                  | 22.15                   | 29.293                     |
| 7517 | Non-tumor    | 28.527                     | 28.947                  | 22.96                   | 25.983                  | 27.787                  | 27.384                 | 31.079                  | 23.145                  | 30.023                     |
| 7523 | Non-tumor    | 28.58                      | 28.841                  | 23.512                  | 26.977                  | 27.31                   | 28.012                 | 32.143                  | 22.941                  | 29.004                     |
| 7525 | Non-tumor    | 30.049                     | 26.619                  | 23.934                  | 26.893                  | 26.978                  | 27.654                 | 32.205                  | 22.919                  | 29.64                      |
| 7527 | Non-tumor    | 28.448                     | 28.688                  | 23.144                  | 25.94                   | 26.856                  | 27.011                 | 30.897                  | 22.995                  | 28.694                     |
| 7529 | Non-tumor    | 27.523                     | 28.167                  | 23.212                  | 26.448                  | 26.873                  | 27.238                 | 31.106                  | 22.808                  | 29.543                     |
| 7670 | Non-tumor    | 29.076                     | 29.243                  | 22.92                   | 26.233                  | 27.453                  | 27.187                 | 30.686                  | 23.306                  | 29.155                     |
| 7979 | Non-tumor    | 30.483                     | 27.44                   | 23.66                   | 27.283                  | 26.538                  | 26.909                 | 31.194                  | 23.384                  | 30.225                     |
| 7965 | Non-tumor    | 28.428                     | 27.888                  | 22.378                  | 25.949                  | 26.707                  | 26.667                 | 31.183                  | 22.728                  | 28.733                     |
| 6239 | Non-tumor    | 30.953                     | 31.986                  | 25.379                  | 27.43                   | 32.179                  | 30.546                 | 34.983                  | 23.872                  | 33.038                     |
| 7674 | Non-tumor    | 29.3                       | 31.987                  | 24.58                   | 28.327                  | 29.642                  | 30.693                 | 28.856                  | 23.446                  | 30.188                     |
| 7681 | Non-tumor    | 30.034                     | 32.374                  | 24.93                   | 28.663                  | 30.89                   | 30.304                 | 29.613                  | 23.487                  | 30.755                     |
| 8638 | Non-tumor    | 29.856                     | 31.33                   | 24.414                  | 28.16                   | 29.742                  | 30.624                 | 28.554                  | 24.122                  | 31.159                     |
| 8650 | Non-tumor    | 33.149                     | 31.111                  | 24.986                  | 29.4                    | 31.596                  | 30.735                 | 27.776                  | 23.96                   | 33.28                      |
| 8671 | Non-tumor    | 33.416                     | 32.374                  | 24.93                   | 28.663                  | 30.89                   | 30.304                 | 33.971                  | 23.487                  | 33.573                     |



| <b>IDs</b> | <b>Tumor status</b> | <b><u>miR-1260</u></b> | <b><u>miR-185</u></b> | <b><u>miR-186</u></b> | <b><u>miR-720</u></b> | <b><u>miR-192#</u></b> | <b><u>miR-30b</u></b> | <b><u>miR-636</u></b> | <b><u>miR-197</u></b> | <b><u>miR-200c</u></b> |
|------------|---------------------|------------------------|-----------------------|-----------------------|-----------------------|------------------------|-----------------------|-----------------------|-----------------------|------------------------|
| 7514       | Tumor               | 25.064                 | 29.758                | 25.608                | 19.287                | 28.014                 | 23.178                | 34.697                | 31.169                | 31.363                 |
| 7516       | Tumor               | 25.348                 | 28.947                | 26.885                | 19.841                | 27.065                 | 23.132                | 32.741                | 33.041                | 31.619                 |
| 7518       | Tumor               | 24.063                 | 28.66                 | 24.067                | 18.363                | 27.368                 | 23.794                | 33.263                | 28.852                | 31.613                 |
| 7524       | Tumor               | 26.117                 | 28.411                | 25.495                | 21.571                | 28.4                   | 23.728                | 34.918                | 30.679                | 32.981                 |
| 7526       | Tumor               | 25.148                 | 28.692                | 25.104                | 18.575                | 27.238                 | 21.821                | 34.252                | 30.46                 | 31.747                 |
| 7528       | Tumor               | 26.062                 | 27.809                | 24.768                | 21.418                | 28.25                  | 22.753                | 36.679                | 30.719                | 30.404                 |
| 7530       | Tumor               | 26.264                 | 27.722                | 24.73                 | 20.515                | 28.087                 | 23.553                | 34.902                | 29.782                | 30.704                 |
| 7669       | Tumor               | 24.053                 | 28.662                | 25.741                | 18.921                | 28.938                 | 23.569                | 33.077                | 31.122                | 30.079                 |
| 7980       | Tumor               | 25.012                 | 30.137                | 25.295                | 19.832                | 27.424                 | 23.715                | 34.121                | 30.46                 | 33.989                 |
| 7966       | Tumor               | 25.364                 | 29.174                | 25.393                | 20.026                | 27.52                  | 23.553                | 34.281                | 30.746                | 31.819                 |
| 6240       | Tumor               | 26.049                 | 31.983                | 25.997                | 21.189                | 30.555                 | 25.871                | 25.096                | 28.685                | 31.132                 |
| 7673       | Tumor               | 24.815                 | 32.561                | 27.06                 | 19.281                | 30.91                  | 25.946                | 25.691                | 31.625                | 31.408                 |
| 7682       | Tumor               | 25.031                 | 32.563                | 27.035                | 19.36                 | 30.542                 | 25.281                | 25.477                | 30.282                | 30.923                 |
| 8639       | Tumor               | 26.867                 | 32.016                | 25.841                | 22.536                | 32.574                 | 25.401                | 25.497                | 30.164                | 24.304                 |
| 8651       | Tumor               | 25.96                  | 31.1                  | 25.522                | 20.753                | 31.59                  | 25.277                | 25.223                | 31.693                | 29.36                  |
| 8672       | Tumor               | 26.233                 | 34.217                | 27.246                | 21.63                 | 35.825                 | 25.492                | 25.174                | 30.798                | 32.576                 |
| 7513       | Non-tumor           | 24.383                 | 28.852                | 25.174                | 19.748                | 27.812                 | 23.718                | 35.114                | 30.641                | 35.215                 |
| 7515       | Non-tumor           | 26.445                 | 25.917                | 24.363                | 20.995                | 28.73                  | 22.999                | 32.849                | 30.336                | 29.145                 |
| 7517       | Non-tumor           | 25.52                  | 29.18                 | 25.78                 | 18.927                | 27.501                 | 23.344                | 33.993                | 30.837                | 32.082                 |
| 7523       | Non-tumor           | 24.976                 | 29.13                 | 25.029                | 19.394                | 28.348                 | 23.902                | 37.704                | 30.541                | 33.001                 |
| 7525       | Non-tumor           | 25.27                  | 29.341                | 25.468                | 19.778                | 28.555                 | 24.084                | 34.003                | 30.779                | 29.635                 |
| 7527       | Non-tumor           | 24.191                 | 28.549                | 25.069                | 19.958                | 27.943                 | 23.292                | 33.15                 | 30.447                | 31.005                 |
| 7529       | Non-tumor           | 24.806                 | 28.878                | 25.12                 | 19.073                | 28.367                 | 23.518                | 34.522                | 30.376                | 29.682                 |
| 7670       | Non-tumor           | 24.802                 | 29.312                | 25.386                | 18.938                | 27.76                  | 23.282                | 34.859                | 30.182                | 29.968                 |
| 7979       | Non-tumor           | 26.514                 | 28.35                 | 26.213                | 21.156                | 27.467                 | 23.986                | 34.861                | 33.025                | 32.071                 |
| 7965       | Non-tumor           | 25.238                 | 28.948                | 24.809                | 19.605                | 27.265                 | 22.6                  | 34.07                 | 30.7                  | 33.208                 |
| 6239       | Non-tumor           | 26.958                 | 35.225                | 28.68                 | 21.99                 | 32.989                 | 26.026                | 26.583                | 30.829                | 31.106                 |
| 7674       | Non-tumor           | 25.297                 | 32.638                | 24.626                | 20.571                | 31.469                 | 25.023                | 25.725                | 30.03                 | 28.914                 |
| 7681       | Non-tumor           | 25.737                 | 32.575                | 26.197                | 19.597                | 31.245                 | 25.485                | 26.104                | 29.676                | 28.701                 |
| 8638       | Non-tumor           | 26.603                 | 34.072                | 26.483                | 21.277                | 30.322                 | 24.761                | 25.89                 | 31.209                | 31.8                   |
| 8650       | Non-tumor           | 25.838                 | 32.905                | 25.532                | 19.849                | 30.512                 | 26.182                | 25.451                | 32.222                | 34.445                 |
| 8671       | Non-tumor           | 26.447                 | 32.575                | 26.197                | 20.403                | 30.474                 | 25.485                | 26.104                | 29.676                | 28.701                 |



| <b>IDs</b> | <b>Tumor status</b> | <b><u>miR-455</u></b> | <b><u>miR-1233</u></b> | <b><u>mmu-miR-140</u></b> | <b><u>miR-886-3p</u></b> | <b><u>miR-15a</u></b> | <b><u>miR-340</u></b> | <b><u>miR-95</u></b> | <b><u>miR-103</u></b> | <b><u>miR-335</u></b> |
|------------|---------------------|-----------------------|------------------------|---------------------------|--------------------------|-----------------------|-----------------------|----------------------|-----------------------|-----------------------|
| 7514       | Tumor               | 27.695                | 29.639                 | 25.407                    | 29.023                   | 28.786                | 28.869                | 30.172               | 27.152                | 29.162                |
| 7516       | Tumor               | 26.87                 | 28.781                 | 25.926                    | 26.762                   | 29.799                | 28.576                | 28.882               | 28.02                 | 30.343                |
| 7518       | Tumor               | 29.466                | 28.459                 | 25.057                    | 24.286                   | 31.426                | 27.224                | 27.442               | 28.012                | 28.282                |
| 7524       | Tumor               | 30.038                | 28.992                 | 25.458                    | 28.194                   | 29.165                | 29.31                 | 32.999               | 27.922                | 30.54                 |
| 7526       | Tumor               | 26.058                | 28.259                 | 24.46                     | 27.522                   | 28.994                | 26.886                | 27.816               | 25.516                | 27.851                |
| 7528       | Tumor               | 28.966                | 28.561                 | 24.367                    | 26.107                   | 31.788                | 28.426                | 27.408               | 27.558                | 28.316                |
| 7530       | Tumor               | 28.179                | 28.382                 | 23.754                    | 26.811                   | 29.241                | 28.919                | 26.915               | 26.81                 | 29.048                |
| 7669       | Tumor               | 27.786                | 28.787                 | 25.066                    | 28.914                   | 30.349                | 29.84                 | 30.256               | 28.125                | 30.578                |
| 7980       | Tumor               | 28.461                | 28.963                 | 25.226                    | 28.718                   | 30.535                | 29.578                | 31.963               | 28.351                | 30.214                |
| 7966       | Tumor               | 27.555                | 28.47                  | 25.101                    | 30.184                   | 29.645                | 28.788                | 28.489               | 27.763                | 29.955                |
| 6240       | Tumor               | 31.16                 | 35.439                 | 30.742                    | 30.123                   | 29.186                | 32.642                | 29.684               | 31.294                | 30.838                |
| 7673       | Tumor               | 30.845                | 31.709                 | 29.851                    | 28.326                   | 24.875                | 32.118                | 28.958               | 34.324                | 32.928                |
| 7682       | Tumor               | 33.013                | 30.862                 | 30.674                    | 29.116                   | 23.549                | 30.531                | 28.95                | 30.568                | 31.606                |
| 8639       | Tumor               | 30.388                | 32.004                 | 30.602                    | 29.122                   | 21.079                | 30.773                | 33.264               | 30.17                 | 31.58                 |
| 8651       | Tumor               | 31.516                | 34.719                 | 31.363                    | 25.158                   | 23.43                 | 31.85                 | 28.426               | 31.77                 | 32.908                |
| 8672       | Tumor               | 32.43                 | 32.968                 | 32.112                    | 32.071                   | 30.48                 | 32.922                | 31.407               | 31.071                | 33.187                |
| 7513       | Non-tumor           | 27.735                | 28.297                 | 25.477                    | 26.526                   | 30.594                | 28.941                | 28.214               | 28.221                | 29.301                |
| 7515       | Non-tumor           | 27.485                | 28.724                 | 22.487                    | 26.587                   | 28.931                | 28.806                | 27.272               | 26.496                | 28.96                 |
| 7517       | Non-tumor           | 28.273                | 28.308                 | 25.475                    | 26.68                    | 30.787                | 28.811                | 29.753               | 27.682                | 29.283                |
| 7523       | Non-tumor           | 28.876                | 28.964                 | 25.299                    | 28.16                    | 29.25                 | 29.86                 | 29.842               | 28.296                | 30.16                 |
| 7525       | Non-tumor           | 27.595                | 29.324                 | 25.35                     | 26.448                   | 29.465                | 29.904                | 28.9                 | 28.151                | 31.169                |
| 7527       | Non-tumor           | 28.138                | 28.181                 | 24.536                    | 25.257                   | 29.812                | 29.046                | 28.053               | 27.614                | 28.857                |
| 7529       | Non-tumor           | 28.188                | 28.528                 | 24.714                    | 26.265                   | 30.813                | 28.808                | 27.682               | 27.574                | 29.655                |
| 7670       | Non-tumor           | 27.925                | 27.999                 | 25.277                    | 29.981                   | 30.454                | 27.949                | 28.987               | 27.733                | 28.818                |
| 7979       | Non-tumor           | 28.516                | 28.816                 | 25.677                    | 28.169                   | 31.194                | 28.861                | 29.873               | 28.399                | 30.228                |
| 7965       | Non-tumor           | 27.586                | 28.058                 | 25.079                    | 27.849                   | 29.502                | 27.539                | 29.25                | 27.363                | 29.433                |
| 6239       | Non-tumor           | 32.132                | 30.005                 | 32.527                    | 31.608                   | 27.147                | 32.793                | 32.611               | 32.16                 | 33.178                |
| 7674       | Non-tumor           | 30.406                | 35.105                 | 29.44                     | 28.422                   | 24.465                | 30.652                | 29.006               | 31.093                | 31.419                |
| 7681       | Non-tumor           | 32.169                | 32.351                 | 31.168                    | 29.675                   | 22.664                | 32.226                | 30.05                | 30.775                | 32.404                |
| 8638       | Non-tumor           | 30.742                | 33.481                 | 31.608                    | 31.247                   | 25.153                | 31.098                | 30.981               | 31.085                | 31.663                |
| 8650       | Non-tumor           | 30.329                | 31.171                 | 33.069                    | 29.723                   | 27.017                | 30.969                | 31.348               | 29.706                | 31.361                |
| 8671       | Non-tumor           | 32.169                | 35.074                 | 31.168                    | 29.675                   | 22.664                | 32.226                | 30.05                | 30.775                | 32.404                |

| IDs  | Tumor status | <a href="#">miR-140-3p</a> | <a href="#">miR-320</a> | <a href="#">miR-194</a> | <a href="#">miR-590-3P</a> | <a href="#">miR-335#</a> | <a href="#">miR-15b</a> | <a href="#">mmu-miR-491</a> | <a href="#">miR-875-5p</a> | <a href="#">miR-210</a> |
|------|--------------|----------------------------|-------------------------|-------------------------|----------------------------|--------------------------|-------------------------|-----------------------------|----------------------------|-------------------------|
| 7514 | Tumor        | 30.007                     | 25.007                  | 24.117                  | 31.075                     | 30.41                    | 27.885                  | 30.079                      | 33.589                     | 30.724                  |
| 7516 | Tumor        | 30.005                     | 24.889                  | 23.263                  | 30.437                     | 32.076                   | 29.936                  | 30.16                       | 32.692                     | 29.833                  |
| 7518 | Tumor        | 30.329                     | 24.639                  | 24.342                  | 28.077                     | 28.348                   | 27.626                  | 31.068                      | 34.498                     | 28.628                  |
| 7524 | Tumor        | 29.731                     | 25.884                  | 24.795                  | 29.661                     | 32.322                   | 27.669                  | 30.089                      | 32.143                     | 30.363                  |
| 7526 | Tumor        | 28.646                     | 24.425                  | 23.715                  | 29.175                     | 29.675                   | 26.106                  | 30.044                      | 33.724                     | 29.288                  |
| 7528 | Tumor        | 28.893                     | 25.009                  | 25.343                  | 29.343                     | 29.875                   | 26.685                  | 29.105                      | 33.385                     | 31.098                  |
| 7530 | Tumor        | 27.954                     | 23.459                  | 24.497                  | 28.612                     | 29.681                   | 26.086                  | 27.972                      | 33.778                     | 28.07                   |
| 7669 | Tumor        | 29.066                     | 25.127                  | 24.946                  | 30.121                     | 31.814                   | 28.56                   | 30.506                      | 33.082                     | 32.035                  |
| 7980 | Tumor        | 30.396                     | 24.985                  | 24.294                  | 29.48                      | 30.892                   | 27.561                  | 30.912                      | 33.659                     | 28.221                  |
| 7966 | Tumor        | 29.899                     | 25.201                  | 23.874                  | 28.999                     | 32.442                   | 28.527                  | 29.18                       | 32.403                     | 30.881                  |
| 6240 | Tumor        | 34.26                      | 25.077                  | 27.822                  | 32.643                     | 31.84                    | 29.887                  | 38.669                      | 20.52                      | 29.577                  |
| 7673 | Tumor        | 36.036                     | 24.249                  | 26.648                  | 32.793                     | 33.505                   | 34.225                  | 33.633                      | 21.98                      | 25.533                  |
| 7682 | Tumor        | 35.474                     | 23.495                  | 25.958                  | 32.389                     | 30.542                   | 32.004                  | 33.488                      | 21.764                     | 26.018                  |
| 8639 | Tumor        | 36.487                     | 26.092                  | 28.644                  | 33.141                     | 31.145                   | 29.322                  | 32.176                      | 22.217                     | 26.967                  |
| 8651 | Tumor        | 34.526                     | 25.608                  | 27.644                  | 35.274                     | 34.017                   | 28.96                   | 34.084                      | 21.697                     | 28.203                  |
| 8672 | Tumor        | 36.49                      | 26.953                  | 29.296                  | 36.952                     | 33.608                   | 35.132                  | 33.7                        | 21.723                     | 29.128                  |
| 7513 | Non-tumor    | 30.025                     | 24.848                  | 24.12                   | 29.574                     | 30.552                   | 28.395                  | 29.921                      | 33.753                     | 30.616                  |
| 7515 | Non-tumor    | 26.487                     | 23.662                  | 25.144                  | 29.673                     | 30.842                   | 25.107                  | 29.612                      | 33.115                     | 29.52                   |
| 7517 | Non-tumor    | 30.415                     | 24.755                  | 24.445                  | 29.775                     | 30.665                   | 26.879                  | 29.837                      | 33.826                     | 29.708                  |
| 7523 | Non-tumor    | 29.565                     | 24.59                   | 24.404                  | 29.689                     | 31.476                   | 28.087                  | 30.101                      | 34.26                      | 29.552                  |
| 7525 | Non-tumor    | 29.441                     | 24.597                  | 24.776                  | 30.267                     | 31.845                   | 29.572                  | 30.346                      | 32.723                     | 31.362                  |
| 7527 | Non-tumor    | 28.906                     | 24.701                  | 24.675                  | 28.746                     | 30.636                   | 26.971                  | 30.151                      | 33.029                     | 30.668                  |
| 7529 | Non-tumor    | 29.091                     | 24.392                  | 24.396                  | 29.368                     | 31.184                   | 27.174                  | 30.048                      | 32.926                     | 29.454                  |
| 7670 | Non-tumor    | 30.373                     | 25.198                  | 24.339                  | 29.237                     | 31.098                   | 27.823                  | 31.011                      | 33.757                     | 30.738                  |
| 7979 | Non-tumor    | 30.607                     | 25.287                  | 24.456                  | 29.692                     | 31.221                   | 27.618                  | 31.117                      | 34.2                       | 29.206                  |
| 7965 | Non-tumor    | 29.673                     | 25.075                  | 23.594                  | 29.097                     | 31.234                   | 26.755                  | 30.065                      | 32.018                     | 29.316                  |
| 6239 | Non-tumor    | 38.558                     | 26.477                  | 26.881                  | 33.979                     | 32.985                   | 30.974                  | 33.173                      | 18.187                     | 28.926                  |
| 7674 | Non-tumor    | 32.366                     | 24.589                  | 26.933                  | 32.128                     | 31.878                   | 30.148                  | 34.306                      | 22.101                     | 25.97                   |
| 7681 | Non-tumor    | 36.055                     | 25.456                  | 27.665                  | 33.03                      | 31.002                   | 32.669                  | 33.842                      | 21.628                     | 26.708                  |
| 8638 | Non-tumor    | 34.339                     | 25.894                  | 27.424                  | 33.19                      | 31.436                   | 32.521                  | 31.65                       | 21.828                     | 28.777                  |
| 8650 | Non-tumor    | 38.236                     | 25.491                  | 27.498                  | 33.746                     | 31.717                   | 31.932                  | 35.078                      | 21.449                     | 27.647                  |
| 8671 | Non-tumor    | 36.055                     | 25.456                  | 27.665                  | 35.9                       | 31.99                    | 32.669                  | 33.842                      | 22.676                     | 26.708                  |

| <b>IDs</b> | <b>Tumor status</b> | <b><u>miR-29a</u></b> | <b><u>miR-1274B</u></b> | <b><u>miR-618</u></b> | <b><u>miR-192</u></b> |
|------------|---------------------|-----------------------|-------------------------|-----------------------|-----------------------|
| 7514       | Tumor               | 22.73                 | 17.975                  | 23.691                | 22.122                |
| 7516       | Tumor               | 22.535                | 18.608                  | 23.841                | 21.135                |
| 7518       | Tumor               | 23.654                | 16.932                  | 24.407                | 22.035                |
| 7524       | Tumor               | 22.107                | 18.76                   | 23.584                | 22.514                |
| 7526       | Tumor               | 21.57                 | 16.201                  | 23.277                | 21.828                |
| 7528       | Tumor               | 21.582                | 18.496                  | 23.443                | 22.903                |
| 7530       | Tumor               | 21.982                | 17.397                  | 23.494                | 22.589                |
| 7669       | Tumor               | 22.484                | 17.979                  | 23.406                | 22.365                |
| 7980       | Tumor               | 22.977                | 18.128                  | 23.356                | 21.455                |
| 7966       | Tumor               | 21.992                | 18.239                  | 23.792                | 21.651                |
| 6240       | Tumor               | 25.474                | 18.385                  | 31.709                | 24.666                |
| 7673       | Tumor               | 24.62                 | 17.266                  | 35.183                | 24.905                |
| 7682       | Tumor               | 24.423                | 17.074                  | 31.832                | 23.589                |
| 8639       | Tumor               | 24.51                 | 20.228                  | 34.034                | 25.99                 |
| 8651       | Tumor               | 23.728                | 18.695                  | 32.576                | 24.621                |
| 8672       | Tumor               | 25.774                | 20.366                  | 30.963                | 26.462                |
| 7513       | Non-tumor           | 22.208                | 18.197                  | 23.594                | 21.952                |
| 7515       | Non-tumor           | 20.842                | 17.611                  | 22.779                | 22.917                |
| 7517       | Non-tumor           | 22.231                | 16.679                  | 23.484                | 22.276                |
| 7523       | Non-tumor           | 22.481                | 17.808                  | 23.983                | 22.325                |
| 7525       | Non-tumor           | 22.173                | 19.134                  | 23.027                | 22.462                |
| 7527       | Non-tumor           | 21.702                | 16.73                   | 23.556                | 22.244                |
| 7529       | Non-tumor           | 21.945                | 16.964                  | 24.074                | 22.375                |
| 7670       | Non-tumor           | 22.559                | 16.973                  | 23.628                | 22.012                |
| 7979       | Non-tumor           | 22.366                | 18.793                  | 22.223                | 22.042                |
| 7965       | Non-tumor           | 21.965                | 16.819                  | 22.211                | 21.561                |
| 6239       | Non-tumor           | 26.324                | 19.951                  | 34.599                | 25.155                |
| 7674       | Non-tumor           | 24.257                | 19.441                  | 33.315                | 24.27                 |
| 7681       | Non-tumor           | 25.193                | 17.965                  | 34.628                | 24.975                |
| 8638       | Non-tumor           | 24.988                | 19.2                    | 30.466                | 24.663                |
| 8650       | Non-tumor           | 25.524                | 17.704                  | 32.11                 | 24.662                |
| 8671       | Non-tumor           | 25.193                | 20.894                  | 34.628                | 24.975                |

**Supplementary Table 3.** Stability tests (geNorm and NormFinder) for 157 miRNAs/ncRNAs that were detectable in 100% of HCC tissues

| Rank of stability | geNorm          |          | Rank of stability | NormFinder      |                   |
|-------------------|-----------------|----------|-------------------|-----------------|-------------------|
|                   | miRNAs/ncRNAs   | M socre* |                   | miRNAs/ncRNAs   | Stability value** |
| 1                 | miR-30c/miR-30b | 0.024    | 1                 | miR-30c/miR-126 | 0.113             |
| 2                 | miR-335         | 0.030    | 2                 | miR-24          | 0.190             |
| 3                 | miR-340         | 0.032    | 3                 | miR-374         | 0.222             |
| 4                 | miR-331         | 0.033    | 4                 | miR-29c         | 0.225             |
| 5                 | miR-744         | 0.035    | 5                 | miR-28-3p       | 0.227             |
| 6                 | miR-324-3p      | 0.036    | 6                 | miR-30b         | 0.283             |
| 7                 | miR-25          | 0.037    | 7                 | miR-132         | 0.288             |
| 8                 | miR-532         | 0.038    | 8                 | miR-186         | 0.292             |
| 9                 | miR-362         | 0.039    | 9                 | miR-29a         | 0.300             |
| 10                | miR-106b        | 0.040    | 10                | miR-30e-3p      | 0.311             |
| 11                | miR-93#         | 0.040    | 11                | miR-27a         | 0.317             |
| 12                | miR-425-5p      | 0.041    | 12                | miR-28          | 0.324             |
| 13                | miR-454         | 0.041    | 13                | miR-181a        | 0.326             |
| 14                | miR-191         | 0.042    | 14                | miR-191         | 0.327             |
| 15                | miR-590-5p      | 0.042    | 15                | miR-340#        | 0.333             |
| 16                | miR-374         | 0.043    | 16                | miR-152         | 0.335             |
| 17                | U6-snRNA        | 0.043    | 17                | miR-125a-5p     | 0.335             |
| 18                | miR-28          | 0.044    | 18                | let-7e          | 0.339             |
| 19                | miR-26b         | 0.044    | 19                | miR-192         | 0.344             |
| 20                | miR-193a-5p     | 0.045    | 20                | miR-335         | 0.344             |
| 21                | miR-34a#        | 0.045    | 21                | miR-335#        | 0.357             |
| 22                | miR-29c         | 0.046    | 22                | miR-320         | 0.357             |
| 23                | miR-28-3p       | 0.046    | 23                | miR-26b         | 0.362             |
| 24                | miR-24          | 0.047    | 24                | miR-30a-3p      | 0.363             |
| 25                | miR-152         | 0.047    | 25                | miR-194         | 0.367             |
| 26                | miR-151-5P      | 0.048    | 26                | miR-455         | 0.375             |
| 27                | miR-103         | 0.048    | 27                | miR-720         | 0.377             |
| 28                | miR-29a         | 0.048    | 28                | miR-340         | 0.378             |
| 29                | miR-92a         | 0.049    | 29                | miR-103         | 0.382             |
| 30                | miR-340#        | 0.049    | 30                | miR-1274B       | 0.392             |
| 31                | miR-345         | 0.050    | 31                | miR-342-3p      | 0.402             |
| 32                | RNU48           | 0.050    | 32                | miR-95          | 0.407             |

|    |             |       |    |                |       |
|----|-------------|-------|----|----------------|-------|
| 33 | miR-30e-3p  | 0.051 | 33 | miR-99b        | 0.407 |
| 34 | miR-192     | 0.051 | 34 | miR-192#       | 0.409 |
| 35 | miR-194     | 0.051 | 35 | miR-34a#       | 0.411 |
| 36 | miR-660     | 0.052 | 36 | miR-126#       | 0.415 |
| 37 | miR-455     | 0.052 | 37 | rno-miR-7#     | 0.416 |
| 38 | miR-27b     | 0.052 | 38 | miR-328        | 0.419 |
| 39 | miR-126     | 0.053 | 39 | miR-1260       | 0.426 |
| 40 | miR-181a    | 0.053 | 40 | miR-218        | 0.426 |
| 41 | let-7e      | 0.053 | 41 | miR-744        | 0.427 |
| 42 | miR-186     | 0.054 | 42 | miR-92a        | 0.440 |
| 43 | miR-625#    | 0.054 | 43 | miR-331        | 0.442 |
| 44 | miR-342-3p  | 0.054 | 44 | miR-574-3p     | 0.448 |
| 45 | miR-335#    | 0.054 | 45 | miR-193a-5p    | 0.448 |
| 46 | miR-328     | 0.055 | 46 | miR-146b       | 0.448 |
| 47 | miR-132     | 0.055 | 47 | miR-146a       | 0.448 |
| 48 | miR-27a     | 0.055 | 48 | U6-snRNA       | 0.455 |
| 49 | miR-192#    | 0.056 | 49 | miR-590-5p     | 0.458 |
| 50 | RNU44       | 0.056 | 50 | miR-376a       | 0.466 |
| 51 | miR-324-5p  | 0.056 | 51 | miR-365        | 0.467 |
| 52 | miR-19b     | 0.057 | 52 | miR-27b        | 0.474 |
| 53 | miR-339-5p  | 0.057 | 53 | mmu-miR-374-5p | 0.479 |
| 54 | miR-106a    | 0.057 | 54 | miR-149        | 0.484 |
| 55 | miR-185     | 0.057 | 55 | miR-664        | 0.484 |
| 56 | miR-590-3P  | 0.058 | 56 | miR-155        | 0.487 |
| 57 | miR-455-3p  | 0.058 | 57 | let-7g         | 0.487 |
| 58 | miR-125a-5p | 0.058 | 58 | miR-324-3p     | 0.489 |
| 59 | miR-99b     | 0.058 | 59 | miR-30a-5p     | 0.491 |
| 60 | miR-1290    | 0.059 | 60 | miR-590-3P     | 0.492 |
| 61 | miR-598     | 0.059 | 61 | mmu-miR-491    | 0.495 |
| 62 | miR-550     | 0.059 | 62 | miR-494        | 0.500 |
| 63 | miR-320     | 0.060 | 63 | miR-409-3p     | 0.505 |
| 64 | miR-339-3p  | 0.060 | 64 | miR-411        | 0.507 |
| 65 | rno-miR-7#  | 0.060 | 65 | miR-197        | 0.511 |
| 66 | miR-34a     | 0.060 | 66 | miR-1233       | 0.523 |
| 67 | miR-19a     | 0.061 | 67 | miR-625#       | 0.524 |
| 68 | miR-155     | 0.061 | 68 | miR-151-5P     | 0.526 |

|     |             |       |     |            |       |
|-----|-------------|-------|-----|------------|-------|
| 69  | miR-146a    | 0.061 | 69  | miR-886-3p | 0.526 |
| 70  | miR-218     | 0.062 | 70  | miR-660    | 0.528 |
| 71  | miR-17      | 0.062 | 71  | miR-425-5p | 0.531 |
| 72  | miR-99a     | 0.062 | 72  | miR-25     | 0.536 |
| 73  | mmu-miR-491 | 0.062 | 73  | miR-34a    | 0.540 |
| 74  | miR-20a     | 0.063 | 74  | miR-185    | 0.542 |
| 75  | miR-145#    | 0.063 | 75  | miR-628-5p | 0.546 |
| 76  | miR-30a-5p  | 0.063 | 76  | miR-15b    | 0.549 |
| 77  | miR-30d     | 0.063 | 77  | miR-454    | 0.550 |
| 78  | miR-376c    | 0.064 | 78  | miR-143    | 0.554 |
| 79  | let-7g      | 0.064 | 79  | RNU48      | 0.561 |
| 80  | miR-195     | 0.064 | 80  | miR-19b    | 0.563 |
| 81  | mmu-miR-93  | 0.065 | 81  | miR-193b   | 0.564 |
| 82  | miR-1260    | 0.065 | 82  | miR-130a   | 0.565 |
| 83  | miR-376a    | 0.065 | 83  | miR-16     | 0.566 |
| 84  | miR-149     | 0.065 | 84  | miR-148a   | 0.567 |
| 85  | miR-20b     | 0.066 | 85  | miR-532    | 0.571 |
| 86  | miR-130a    | 0.066 | 86  | miR-145#   | 0.577 |
| 87  | miR-16      | 0.066 | 87  | miR-20a    | 0.578 |
| 88  | miR-204     | 0.067 | 88  | miR-455-3p | 0.578 |
| 89  | miR-484     | 0.067 | 89  | miR-106b   | 0.589 |
| 90  | miR-574-3p  | 0.067 | 90  | miR-195    | 0.590 |
| 91  | miR-126#    | 0.067 | 91  | miR-26a    | 0.606 |
| 92  | miR-100     | 0.068 | 92  | miR-212    | 0.615 |
| 93  | miR-664     | 0.068 | 93  | let-7c     | 0.617 |
| 94  | miR-95      | 0.068 | 94  | miR-223    | 0.617 |
| 95  | miR-494     | 0.069 | 95  | miR-339-5p | 0.621 |
| 96  | miR-148a    | 0.069 | 96  | miR-150    | 0.627 |
| 97  | miR-136#    | 0.069 | 97  | miR-17     | 0.630 |
| 98  | let-7b      | 0.069 | 98  | miR-484    | 0.631 |
| 99  | miR-21      | 0.070 | 99  | miR-20b    | 0.633 |
| 100 | miR-1233    | 0.070 | 100 | miR-19a    | 0.635 |
| 101 | miR-411     | 0.070 | 101 | miR-10a    | 0.637 |
| 102 | miR-125b    | 0.071 | 102 | miR-598    | 0.643 |
| 103 | miR-10a     | 0.071 | 103 | miR-345    | 0.647 |
| 104 | miR-143     | 0.071 | 104 | miR-1290   | 0.657 |

|     |                |       |     |             |       |
|-----|----------------|-------|-----|-------------|-------|
| 105 | miR-15b        | 0.072 | 105 | miR-99a     | 0.658 |
| 106 | miR-30a-3p     | 0.072 | 106 | miR-204     | 0.662 |
| 107 | miR-1274B      | 0.072 | 107 | miR-376c    | 0.666 |
| 108 | miR-720        | 0.073 | 108 | miR-1274A   | 0.678 |
| 109 | let-7c         | 0.073 | 109 | miR-93#     | 0.679 |
| 110 | miR-409-3p     | 0.073 | 110 | miR-136#    | 0.682 |
| 111 | miR-150        | 0.073 | 111 | miR-886-5p  | 0.688 |
| 112 | miR-422a       | 0.074 | 112 | miR-142-3p  | 0.690 |
| 113 | miR-197        | 0.074 | 113 | miR-200b    | 0.692 |
| 114 | miR-886-3p     | 0.074 | 114 | miR-151-3p  | 0.695 |
| 115 | miR-133a       | 0.075 | 115 | mmu-miR-140 | 0.700 |
| 116 | miR-886-5p     | 0.075 | 116 | miR-106a    | 0.711 |
| 117 | miR-224        | 0.075 | 117 | mmu-miR-93  | 0.716 |
| 118 | miR-203        | 0.076 | 118 | let-7a      | 0.718 |
| 119 | miR-365        | 0.076 | 119 | miR-145     | 0.720 |
| 120 | miR-139-5p     | 0.077 | 120 | miR-429     | 0.721 |
| 121 | miR-193b       | 0.077 | 121 | miR-210     | 0.721 |
| 122 | miR-223        | 0.077 | 122 | miR-140-3p  | 0.725 |
| 123 | miR-486        | 0.078 | 123 | miR-22#     | 0.726 |
| 124 | miR-200b       | 0.078 | 124 | miR-30d     | 0.726 |
| 125 | miR-140-3p     | 0.079 | 125 | let-7b      | 0.730 |
| 126 | miR-146b       | 0.079 | 126 | miR-362     | 0.730 |
| 127 | miR-142-3p     | 0.079 | 127 | miR-100     | 0.733 |
| 128 | miR-145        | 0.080 | 128 | miR-125b    | 0.735 |
| 129 | miR-151-3p     | 0.080 | 129 | miR-200c    | 0.742 |
| 130 | miR-222        | 0.081 | 130 | miR-133a    | 0.754 |
| 131 | mmu-miR-374-5p | 0.081 | 131 | miR-550     | 0.755 |
| 132 | miR-199a-3p    | 0.081 | 132 | miR-324-5p  | 0.772 |
| 133 | miR-429        | 0.082 | 133 | miR-21      | 0.776 |
| 134 | miR-214        | 0.082 | 134 | miR-203     | 0.779 |
| 135 | miR-628-5p     | 0.083 | 135 | miR-339-3p  | 0.801 |
| 136 | mmu-miR-140    | 0.083 | 136 | miR-422a    | 0.812 |
| 137 | miR-26a        | 0.084 | 137 | miR-224     | 0.828 |
| 138 | miR-212        | 0.084 | 138 | miR-222     | 0.830 |
| 139 | mmu-miR-451    | 0.085 | 139 | miR-122     | 0.849 |
| 140 | miR-1274A      | 0.086 | 140 | RNU44       | 0.881 |

|     |            |       |     |             |       |
|-----|------------|-------|-----|-------------|-------|
| 141 | miR-22#    | 0.086 | 141 | miR-483-5p  | 0.907 |
| 142 | miR-200c   | 0.087 | 142 | mmu-miR-451 | 0.910 |
| 143 | miR-122    | 0.088 | 143 | miR-885-5p  | 0.935 |
| 144 | let-7a     | 0.089 | 144 | miR-378     | 0.935 |
| 145 | miR-210    | 0.089 | 145 | miR-199a-3p | 0.947 |
| 146 | miR-885-5p | 0.090 | 146 | let-7d      | 1.010 |
| 147 | miR-483-5p | 0.091 | 147 | miR-15a     | 1.019 |
| 148 | miR-378    | 0.092 | 148 | miR-486     | 1.020 |
| 149 | let-7d     | 0.093 | 149 | miR-214     | 1.028 |
| 150 | miR-618    | 0.095 | 150 | miR-618     | 1.069 |
| 151 | miR-15a    | 0.096 | 151 | miR-139-5p  | 1.159 |
| 152 | miR-518f   | 0.098 | 152 | miR-518f    | 1.176 |
| 153 | miR-452    | 0.100 | 153 | miR-378     | 1.232 |
| 154 | miR-636    | 0.102 | 154 | miR-452     | 1.255 |
| 155 | miR-378    | 0.105 | 155 | miR-636     | 1.433 |
| 156 | miR-875-5p | 0.108 | 156 | miR-875-5p  | 1.800 |

---

\* If including the mean of global miRNAs, the M score for miR-30c and mean of global miRNAs is 0.022;

\*\* If including the mean of global miRNAs, the stability value for miR-30c and mean of global miRNAs is 0.088;



**Supplementary Table 4.** Using 3 endogenous controls to normalize miRNAs expression identified 46 miRNAs significantly aberrantly expressed in HCC tumor tissue

| miRNAs                      | Geom mean in tumor tissue | Geom mean in non-tumor tissue | Fold-change of geometric means | p-value  | FDR      |
|-----------------------------|---------------------------|-------------------------------|--------------------------------|----------|----------|
| <a href="#">miR-196b</a>    | 2.50E-03                  | 3.10E-04                      | 8.60                           | 4.23E-04 | 3.76E-03 |
| <a href="#">miR-182</a>     | 8.90E-04                  | 1.40E-04                      | 7.48                           | 5.87E-04 | 4.81E-03 |
| <a href="#">miR-10b#</a>    | 1.70E-03                  | 3.60E-04                      | 5.10                           | 7.92E-04 | 5.72E-03 |
| <a href="#">miR-139-5p</a>  | 1.00E-02                  | 1.10E-01                      | -10.31                         | 5.00E-07 | 3.01E-05 |
| <a href="#">miR-144#</a>    | 9.90E-04                  | 9.10E-03                      | -9.09                          | 5.70E-06 | 1.71E-04 |
| <a href="#">miR-214</a>     | 1.10E-02                  | 9.80E-02                      | -8.33                          | 7.64E-05 | 1.10E-03 |
| <a href="#">miR-486</a>     | 4.20E-03                  | 3.50E-02                      | -8.33                          | 4.00E-07 | 2.89E-05 |
| <a href="#">miR-199a-3p</a> | 3.50E-02                  | 2.60E-01                      | -7.14                          | 6.04E-05 | 1.08E-03 |
| <a href="#">miR-511</a>     | 6.90E-04                  | 4.60E-03                      | -6.25                          | 8.00E-07 | 3.61E-05 |
| <a href="#">miR-214#</a>    | 1.60E-03                  | 8.20E-03                      | -5.88                          | 2.05E-04 | 2.12E-03 |
| <a href="#">miR-424</a>     | 3.20E-04                  | 1.20E-03                      | -5.56                          | 6.00E-07 | 3.09E-05 |
| <a href="#">miR-422a</a>    | 2.70E-03                  | 1.40E-02                      | -5.26                          | 5.53E-05 | 1.08E-03 |
| <a href="#">miR-99a#</a>    | 7.70E-04                  | 3.80E-03                      | -4.76                          | 3.30E-06 | 1.19E-04 |
| <a href="#">let-7b</a>      | 1.70E-02                  | 7.40E-02                      | -4.35                          | 2.73E-05 | 6.16E-04 |
| <a href="#">miR-100</a>     | 2.40E-02                  | 1.10E-01                      | -4.35                          | 6.20E-06 | 1.72E-04 |
| <a href="#">miR-125b</a>    | 2.70E-02                  | 1.20E-01                      | -4.35                          | 3.00E-07 | 2.89E-05 |
| <a href="#">miR-145</a>     | 7.80E-02                  | 3.10E-01                      | -4.00                          | 1.80E-04 | 1.97E-03 |
| <a href="#">miR-376c</a>    | 3.40E-03                  | 1.40E-02                      | -4.00                          | 7.14E-05 | 1.08E-03 |
| <a href="#">miR-598</a>     | 9.30E-04                  | 3.70E-03                      | -4.00                          | 7.20E-06 | 1.86E-04 |
| <a href="#">miR-204</a>     | 4.10E-03                  | 1.60E-02                      | -3.85                          | 8.42E-04 | 5.96E-03 |
| <a href="#">miR-99a</a>     | 2.30E-02                  | 9.10E-02                      | -3.85                          | 9.36E-05 | 1.30E-03 |
| <a href="#">miR-1201</a>    | 4.60E-04                  | 1.70E-03                      | -3.70                          | 7.15E-05 | 1.08E-03 |
| <a href="#">miR-432#</a>    | 1.20E-04                  | 4.40E-04                      | -3.70                          | 3.35E-04 | 3.18E-03 |
| <a href="#">miR-150</a>     | 1.10E-01                  | 3.90E-01                      | -3.45                          | 4.77E-05 | 1.01E-03 |
| <a href="#">miR-195</a>     | 5.70E-02                  | 1.90E-01                      | -3.45                          | 4.05E-04 | 3.75E-03 |
| <a href="#">miR-381</a>     | 7.30E-05                  | 2.20E-04                      | -3.45                          | 1.19E-04 | 1.53E-03 |
| <a href="#">miR-130a</a>    | 3.60E-03                  | 1.20E-02                      | -3.23                          | 1.97E-04 | 2.09E-03 |
| <a href="#">miR-142-3p</a>  | 2.70E-02                  | 8.60E-02                      | -3.23                          | 1.34E-04 | 1.56E-03 |
| <a href="#">miR-455-3p</a>  | 1.50E-03                  | 4.90E-03                      | -3.23                          | 6.39E-04 | 4.91E-03 |
| <a href="#">miR-378</a>     | 7.80E-01                  | 2.36E+00                      | -3.03                          | 6.42E-05 | 1.08E-03 |
| <a href="#">miR-146a</a>    | 1.60E-01                  | 4.40E-01                      | -2.70                          | 6.50E-04 | 4.91E-03 |
| <a href="#">miR-193a-5p</a> | 6.30E-03                  | 1.70E-02                      | -2.70                          | 4.60E-06 | 1.51E-04 |
| <a href="#">miR-411</a>     | 2.10E-03                  | 5.50E-03                      | -2.63                          | 5.54E-04 | 4.65E-03 |
| <a href="#">miR-26b</a>     | 9.40E-02                  | 2.40E-01                      | -2.56                          | < 1e-07  | < 1e-07  |
| <a href="#">miR-342-3p</a>  | 6.10E-02                  | 1.50E-01                      | -2.50                          | 1.43E-04 | 1.62E-03 |
| <a href="#">miR-574-3p</a>  | 1.50E-01                  | 3.80E-01                      | -2.50                          | 6.06E-05 | 1.08E-03 |
| <a href="#">let-7g</a>      | 5.40E-02                  | 1.30E-01                      | -2.44                          | 1.26E-04 | 1.56E-03 |
| <a href="#">let-7e</a>      | 6.50E-02                  | 1.50E-01                      | -2.33                          | 7.40E-04 | 5.45E-03 |
| <a href="#">miR-101</a>     | 2.00E-03                  | 4.20E-03                      | -2.33                          | 1.11E-04 | 1.49E-03 |
| <a href="#">miR-30d#</a>    | 4.60E-04                  | 1.30E-03                      | -2.27                          | 9.00E-06 | 2.17E-04 |
| <a href="#">miR-30e-3p</a>  | 5.30E-02                  | 1.20E-01                      | -2.22                          | 7.02E-05 | 1.08E-03 |
| <a href="#">miR-374</a>     | 1.60E-02                  | 3.20E-02                      | -2.08                          | 2.67E-04 | 2.60E-03 |

|                            |          |          |       |          |          |
|----------------------------|----------|----------|-------|----------|----------|
| <a href="#">miR-29c</a>    | 1.10E-02 | 2.20E-02 | -2.04 | 2.37E-04 | 2.38E-03 |
| <a href="#">miR-628-5p</a> | 4.10E-03 | 8.30E-03 | -2.04 | 6.53E-04 | 4.91E-03 |
| <a href="#">miR-28</a>     | 1.10E-02 | 2.20E-02 | -2.00 | 2.20E-06 | 8.82E-05 |
| <a href="#">miR-28-3p</a>  | 5.40E-02 | 1.10E-01 | -2.00 | 4.00E-07 | 2.89E-05 |

---

**Supplementary Table 5.** Using geNorm tool identified 2 miRNAs (miR-30c and miR-30b) as a normalizer resulting in 17 miRNAs being significantly aberrantly expressed in HCC tumor tissue

| <b>miRNAs</b>               | <b>Geom mean in tumor tissue</b> | <b>Geom mean in non-tumor tissue</b> | <b>Fold-change of geometric means</b> | <b>p-value</b> | <b>FDR</b> |
|-----------------------------|----------------------------------|--------------------------------------|---------------------------------------|----------------|------------|
| <a href="#">miR-183</a>     | 1.50E-03                         | 1.30E-04                             | 15.12                                 | 9.34E-04       | 2.06E-02   |
| <a href="#">miR-196b</a>    | 9.40E-03                         | 6.70E-04                             | 14.85                                 | 4.74E-05       | 2.50E-03   |
| <a href="#">miR-182</a>     | 3.30E-03                         | 2.90E-04                             | 12.85                                 | 1.26E-04       | 5.05E-03   |
| <a href="#">miR-10b#</a>    | 6.50E-03                         | 8.10E-04                             | 8.85                                  | 4.85E-05       | 2.50E-03   |
| <a href="#">miR-18a</a>     | 1.50E-02                         | 5.10E-03                             | 3.48                                  | 9.71E-04       | 2.06E-02   |
| <a href="#">miR-106a</a>    | 4.22E+00                         | 2.10E+00                             | 2.01                                  | 1.61E-04       | 5.82E-03   |
| <a href="#">miR-139-5p</a>  | 3.80E-02                         | 2.30E-01                             | -5.88                                 | 4.80E-06       | 8.42E-04   |
| <a href="#">miR-144#</a>    | 3.80E-03                         | 2.00E-02                             | -5.56                                 | 1.11E-04       | 5.02E-03   |
| <a href="#">miR-214</a>     | 4.30E-02                         | 2.10E-01                             | -5.00                                 | 5.17E-04       | 1.26E-02   |
| <a href="#">miR-486</a>     | 1.60E-02                         | 7.60E-02                             | -5.00                                 | 6.30E-06       | 8.42E-04   |
| <a href="#">miR-199a-3p</a> | 1.30E-01                         | 5.50E-01                             | -4.17                                 | 4.76E-04       | 1.26E-02   |
| <a href="#">miR-511</a>     | 2.40E-03                         | 9.80E-03                             | -3.85                                 | 7.00E-06       | 8.42E-04   |
| <a href="#">miR-424</a>     | 1.20E-03                         | 2.60E-03                             | -3.33                                 | 2.30E-05       | 1.66E-03   |
| <a href="#">miR-99a#</a>    | 3.00E-03                         | 8.10E-03                             | -2.70                                 | 4.14E-04       | 1.26E-02   |
| <a href="#">miR-100</a>     | 8.90E-02                         | 2.30E-01                             | -2.56                                 | 4.33E-04       | 1.26E-02   |
| <a href="#">let-7b</a>      | 6.30E-02                         | 1.60E-01                             | -2.50                                 | 5.23E-04       | 1.26E-02   |
| <a href="#">miR-125b</a>    | 1.00E-01                         | 2.50E-01                             | -2.50                                 | 1.62E-05       | 1.46E-03   |

**Supplementary Table 6.** Using NormFinder tool identified 2 miRNAs (miR-30c and miR-126) as a normalizer resulting in 20 miRNAs being significantly aberrantly expressed in HCC tumor tissue

| <b>miRNAs</b>               | <b>Geom mean in tumor tissue</b> | <b>Geom mean in non-tumor tissue</b> | <b>Fold-change of geometric means</b> | <b>p-value</b> | <b>FDR</b> |
|-----------------------------|----------------------------------|--------------------------------------|---------------------------------------|----------------|------------|
| <a href="#">miR-183</a>     | 5.70E-04                         | 4.30E-05                             | 16.79                                 | 9.00E-04       | 1.70E-02   |
| <a href="#">miR-196b</a>    | 3.40E-03                         | 2.20E-04                             | 16.43                                 | 5.11E-05       | 2.58E-03   |
| <a href="#">miR-182</a>     | 1.20E-03                         | 9.50E-05                             | 14.75                                 | 5.72E-05       | 2.58E-03   |
| <a href="#">miR-10b#</a>    | 2.40E-03                         | 2.60E-04                             | 9.92                                  | 3.08E-05       | 2.22E-03   |
| <a href="#">miR-1180</a>    | 7.50E-04                         | 2.70E-04                             | 4.55                                  | 8.36E-04       | 1.70E-02   |
| <a href="#">miR-130b#</a>   | 3.40E-04                         | 9.10E-05                             | 4.26                                  | 6.48E-04       | 1.53E-02   |
| <a href="#">miR-18a</a>     | 5.60E-03                         | 1.60E-03                             | 4.25                                  | 6.78E-04       | 1.53E-02   |
| <a href="#">miR-339-3p</a>  | 5.10E-03                         | 2.00E-03                             | 2.62                                  | 6.08E-04       | 1.53E-02   |
| <a href="#">miR-21</a>      | 3.90E-01                         | 1.60E-01                             | 2.5                                   | 9.40E-04       | 1.70E-02   |
| <a href="#">miR-106a</a>    | 1.56E+00                         | 6.80E-01                             | 2.28                                  | 4.34E-05       | 2.58E-03   |
| <a href="#">miR-139-5p</a>  | 1.40E-02                         | 7.40E-02                             | -5.26                                 | 2.00E-06       | 7.22E-04   |
| <a href="#">miR-144#</a>    | 1.40E-03                         | 6.40E-03                             | -4.76                                 | 8.17E-05       | 2.95E-03   |
| <a href="#">miR-214</a>     | 1.60E-02                         | 6.90E-02                             | -4.35                                 | 4.72E-04       | 1.48E-02   |
| <a href="#">miR-486</a>     | 5.70E-03                         | 2.50E-02                             | -4.35                                 | 1.16E-05       | 1.75E-03   |
| <a href="#">miR-199a-3p</a> | 4.80E-02                         | 1.80E-01                             | -3.70                                 | 5.28E-04       | 1.48E-02   |
| <a href="#">miR-511</a>     | 8.80E-04                         | 3.20E-03                             | -3.45                                 | 1.94E-05       | 1.75E-03   |
| <a href="#">miR-424</a>     | 4.20E-04                         | 8.50E-04                             | -3.13                                 | 7.94E-05       | 2.95E-03   |
| <a href="#">let-7b</a>      | 2.30E-02                         | 5.10E-02                             | -2.22                                 | 5.34E-04       | 1.48E-02   |
| <a href="#">miR-100</a>     | 3.30E-02                         | 7.40E-02                             | -2.22                                 | 9.33E-04       | 1.70E-02   |
| <a href="#">miR-125b</a>    | 3.70E-02                         | 8.20E-02                             | -2.22                                 | 1.67E-05       | 1.75E-03   |

**Supplementary Table 7.** Dysregulated miRNAs identified by using the mean of miRNAs and the 2 most stable miRNAs as normalizers

| <b>Normalization strategies</b> | <b>Mean of miRNAs</b>                                                                                                                    | <b>geNorm</b> | <b>NormFinder</b>                       |
|---------------------------------|------------------------------------------------------------------------------------------------------------------------------------------|---------------|-----------------------------------------|
| Mean of miRNAs                  | miR-221, miR-222, miR-324-5p, miR-550, miR-362, miR-148b, miR-93#, miR-598                                                               |               | miR-1180, miR-130b#, miR-339-3p, miR-21 |
| geNorm                          |                                                                                                                                          | miR-99a#      | let-7b, miR-100                         |
| geNorm and NormFinder           | miR-196b, miR-183, miR-182, miR-10b#, miR-18a, miR-106a, miR-139-5p, miR-144#, miR-214, miR-486, miR-199a-3p, miR-511, miR-424, miR-125b |               |                                         |

**Supplementary Table 8.** Dysregulated miRNAs identified by using 3 endogenous controls, the mean of miRNAs and the 2 most stable miRNAs as normalizers

| Normalization strategies              | Mean of miRNAs                                                    | 3 endogenous controls                                                                                                                                                                                                                                                                                              |
|---------------------------------------|-------------------------------------------------------------------|--------------------------------------------------------------------------------------------------------------------------------------------------------------------------------------------------------------------------------------------------------------------------------------------------------------------|
| Mean of miRNAs                        | miR-221, miR-222, miR-324-5p, miR-550, miR-362, miR-148b, miR-93# |                                                                                                                                                                                                                                                                                                                    |
| 3 endogenous controls                 | miR-598                                                           | miR-214#, miR-422a, miR-145, miR-376c, miR-204, miR-99a, miR-1201, miR-432#, miR-150, miR-195, miR-381, miR-130a, miR-142-3p, miR-455-3p, miR-378, miR-146a, miR-193a-5p, miR-411, miR-26b, miR-342-3p, miR-574-3p, let-7g, let-7e, miR-101, miR-30d#, miR-30e-3p, miR-374, miR-29c, miR-628-5p, miR-28, miR-28-3p |
| geNorm                                |                                                                   | miR-99a#                                                                                                                                                                                                                                                                                                           |
| NormFinder                            | miR-1180, miR-130b#, miR-339-3p, miR-21                           |                                                                                                                                                                                                                                                                                                                    |
| geNorm and NormFinder                 | miR-183, miR-18a, miR-106a                                        | let-7b, miR-100                                                                                                                                                                                                                                                                                                    |
| Mean of miRNAs, geNorm and NormFinder |                                                                   | miR-196b, miR-182, miR-10b#, miR-139-5p, miR-144#, miR-214, miR-486, miR-199a-3p, miR-511, miR-424 and miR-125b                                                                                                                                                                                                    |

**Supplementary Figure 1.** The distribution of M scores for 157 miRNAs/ncRNAs tested by geNorm tool in HCC tissues. The combination of miR-30c/miR-30b had the smallest M score of 0.024. The stabilities of U6 snRNA, RNU48 and RNU44 ranked 17<sup>th</sup>, 32<sup>nd</sup> and 50<sup>th</sup> respectively, out of 157 candidates, indicating their unsuitability as normalizers.

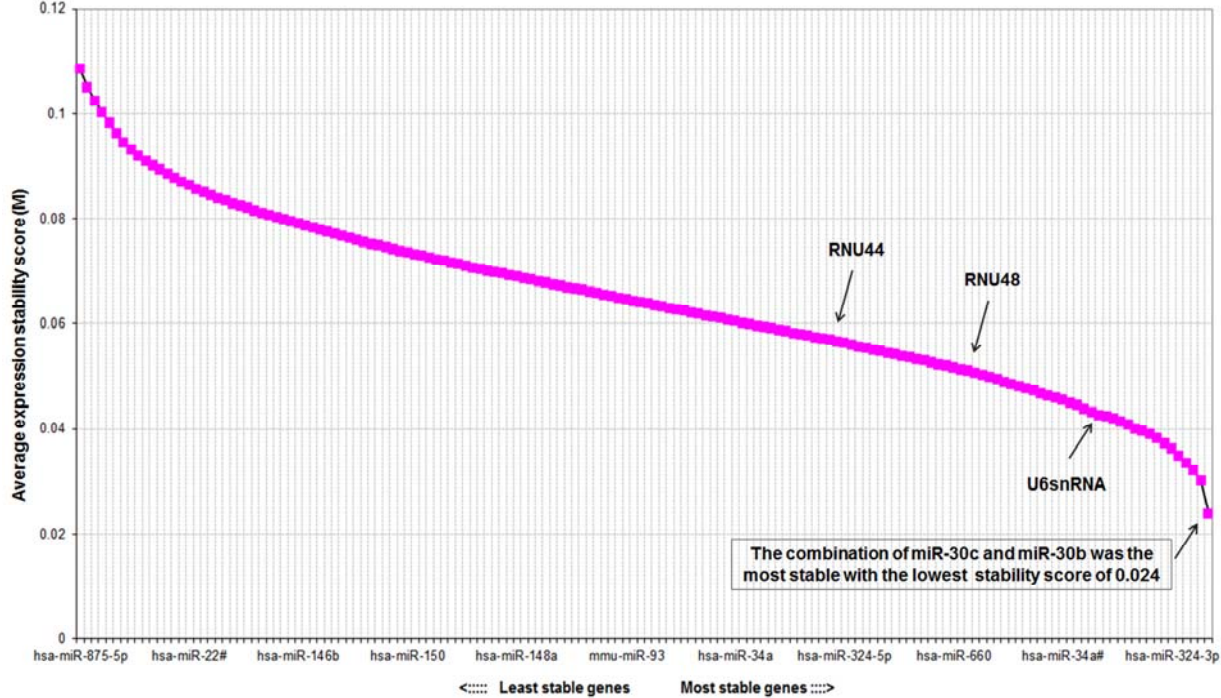

**Supplementary Figure 2.** Comparisons of the consistency and discrepancy of the identified miRNA panels using different normalization strategies. (A) Most miRNAs (14-18) identified by using the mean of miRNAs overlapped with those identified using 2 stable miRNAs as the normalizer. (B) 12-14 miRNAs overlapped with the 46 identified using 3 endogenous controls as the normalizer.

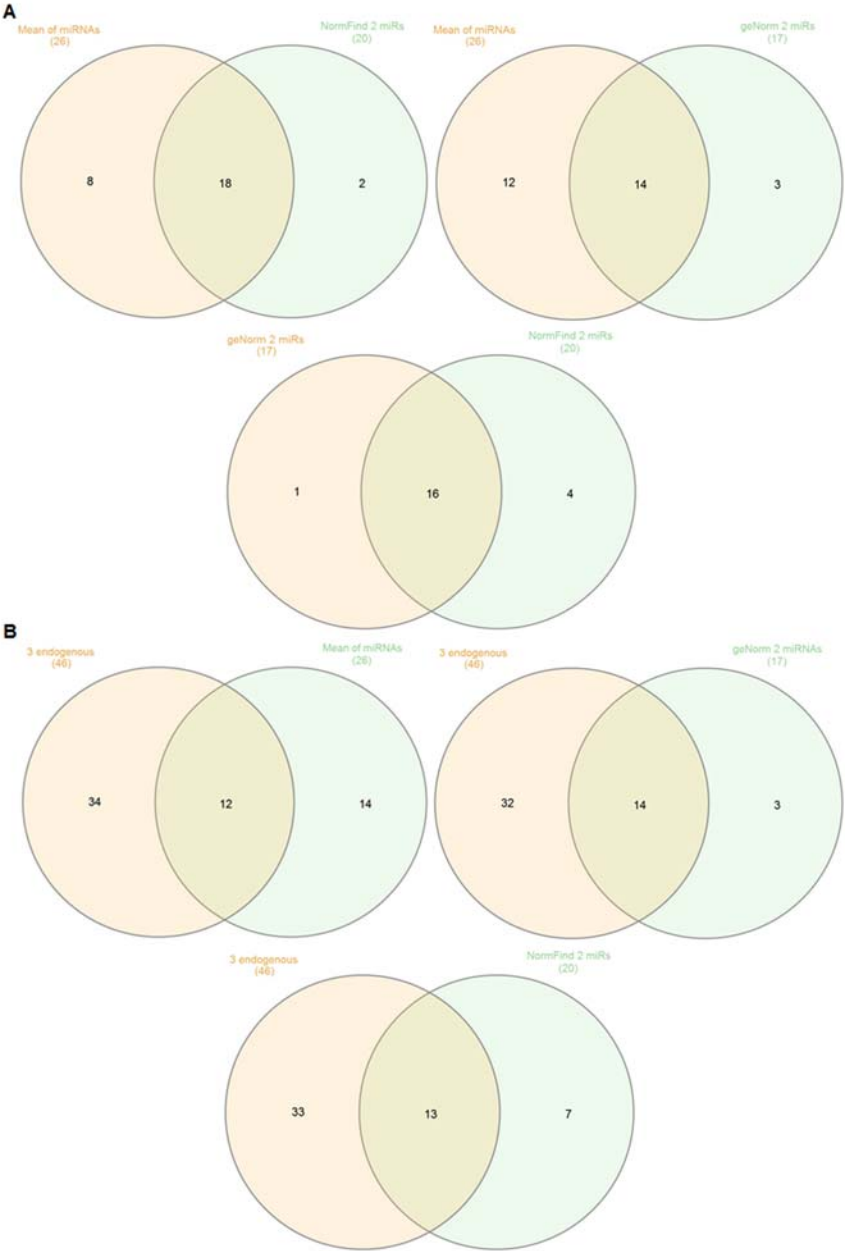



**Supplementary Figure 3.** Comparisons of the consistency and discrepancy of miRNA panels identified using global mean or top stable miRNAs as normalizers. (A) Using the mean of global miRNAs or miR-30c/miR-126 as normalizers, 7 dysregulated miRNAs (miR-183, miR-1180, miR-18a, miR-130b#, miR-339-3p, miR-21 and miR-106a) were identified in HCC tumor tissues. (B) Using the mean of global miRNAs or miR-30c/miR-30b as normalizers, 3 dysregulated oncogenic miRNAs (miR-183, miR-18a and miR-106a) were identified. These miRNAs were not identified using 3 endogenous ncRNAs as normalizer.

**Supplementary Figure 3.**

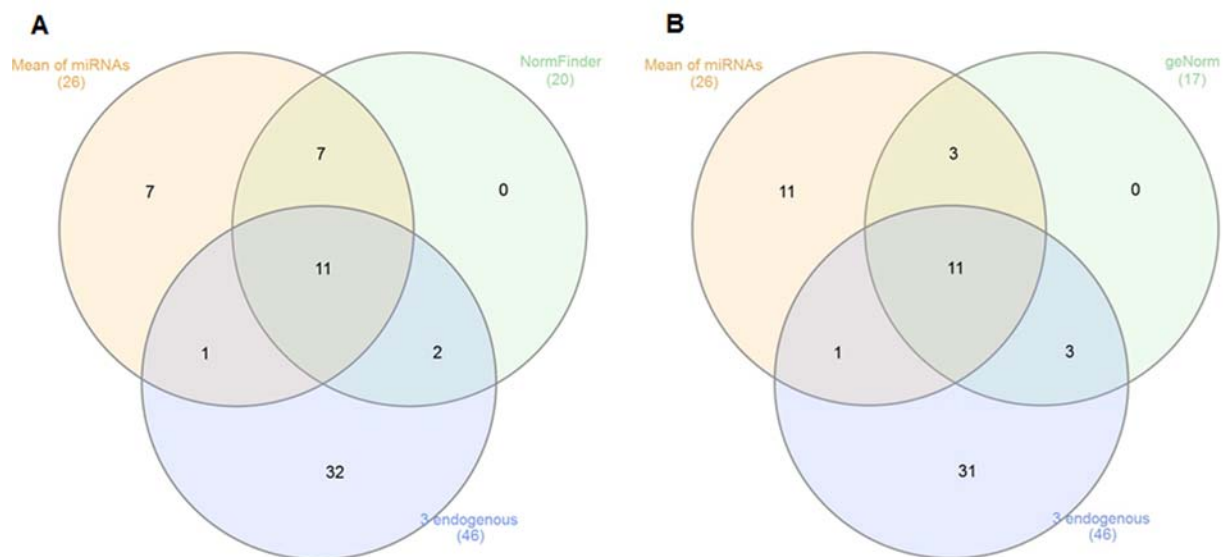

Supplement: NIHMS844691-supplement-Supple.pdf [file NIHMS844691-supplement-Supple.pdf]
